# Supplementary material
Source: publisher figshare collection journal article supplement (https://gsapubs.figshare.com/articles/dataset/_/15025437)
Supplement: Supplementary file 1 [file 1]

## Sheet: Table 1 summary of results
Table S1. Thermobarometry results.
pluton	T	error	P	error
WLP	777	19	1.8	0.3
TILP	727	36	2.3	0.3
KC-eHD	683	23	2.8	0.4
Rush Creek	734	18	2	0.3
Island Pass	720	13	2.2	0.2
T tonalite (T°C)		890	800	755	730	715	692	679	667	658	650	645	640	635
P tonalite (Kbar)		0.1	0.5	1	1.5	2	3	4	5	6	7	8	9	10
T granite (T°C)		860	775	735	705	685	655	641	633	628	623	619	616	614
P granite (Kbar)		0.1	0.5	1	1.5	2	3	4	5	6	7	8	9	10
Tonalite and granite water-saturated solidi after Piwinskii (1968) plotted for reference with P-T estimates in Fig. 9.

## Sheet: WLP
Plagioclase-Hornb+A1:R174lende Thermobarometry (temperature by Holland and Blundy, 1994; Blundy and Holland, 1990;
at pressure by Schmidt, 1992 and Anderson and Smith, 1995)
Spreadsheet prepared by Lawford Anderson, University of Southern California (anderson@usc.edu)
References:	Anderson, J. L. 1996. Status of thermobarometry in granitic batholiths: Transactions of the Royal Society of Edinburgh, v. 87, 125-138. [also published in GSA Special Paper 315]
	Anderson, J. L. & Smith, D. R. 1995. The effect of temperature and oxygen fugacity on Al-in-hornblende barometry. AM MINERAL 80, 549-59.
	Blundy, J. D. & Holland, T. J. B. 1990. Calcic amphibole equilibria and a new amphibole-plagioclase geothermometer. CONTRIB MINERAL PETROL 104, 208-24.
	Holland, T. & Blundy, J. 1994. Non-ideal interactions in calcic amphiboles and their bearing on amphibole-plagioclase thermometry. CONTRIB MINERAL PETROL 116, 433-47.
	Johnson, M. C. & Rutherford, M. J. 1989. Experimental calibration of an aluminum-in-hornblende geobarometer with application to Long Valley caldera (California) volcanic rocks. GEOL 17, 837-841.
	Otten, M. T. 1984. The origin of brown hornblende in the Artfjallet gabbro and dolerites. CONTRIB MINERAL PETROL 86, 189-99.
	Schmidt, M. W. 1992. Amphibole composition in tonalite as a function of pressure: an experimental calibration of the Al-in-hornblende barometer. CONTRIB MINERAL PETROL 110, 304-10.
	Schmidt, M. W. 1993. Phase relations and compositions in tonalite as a function of pressure: an experimental study at 650 °C. AMER J SCIENCE 293, 1011-60.
To use this spreadsheet, simply paste in amphibole (wt. % elements, excluding Sum) and plagioclase (mole fraction) analyses in the examples shown below and use the "Save As" option to protect the original. Cells below the data section are not protected and modification could currupt calculations.
	Extend cell formatting as needed, and re-save
	Final P-T Solution - see section below "Results based on iteration using Anderson and Smith pressure at various thermometers"; Note preferred calibration as explained in Anderson (1996).
				Waugh Lake pluton 05-183
Add data for elements	9	11	21	22	23	24	25	26	27	28	29	34	35	36	50	51	52
Texture	core	rim	core	int	int	int	core	core	int	int	rim	int	int	int	core	int	int
Sample	05-183	05-183	05-183	05-183	05-183	05-183	05-183	05-183	05-183	05-183	05-183	05-183	05-183	05-183	05-183	05-183	05-183
Specimen	1h	1h	4h	4h	4h	4h	4h	5h	5h	5h	5h	8h	8h	8h	9h	9h	9h
SiO2	46.642	46.327	45.755	44.994	46.231	46.602	45.722	45.918	45.497	45.83	45.424	46.733	46.373	46.739	44.559	44.424	46.258
TiO2	1.457	1.42	1.769	2	1.628	1.462	1.444	1.849	1.812	1.687	1.364	1.47	1.482	1.387	2.169	2.06	1.448
Al2O3	7.233	7.475	7.672	8.472	7.539	7.222	7.868	7.729	7.734	7.469	8.004	7.077	7.154	7.007	8.643	8.526	7.119
FeO*	15.714	15.358	15.673	16.628	15.676	15.873	16.526	15.495	15.729	16.169	16.594	15.53	15.694	15.872	15.389	16.318	16.211
MgO	12.792	12.854	12.661	12.02	12.654	12.903	12.079	12.853	12.586	12.418	12.064	13.056	12.885	12.778	12.521	12.183	12.793
MnO	0.637	0.605	0.562	0.557	0.619	0.565	0.507	0.528	0.516	0.635	0.587	0.603	0.644	0.615	0.493	0.581	0.592
CaO	11.701	11.885	11.769	11.786	11.575	11.708	11.901	11.5	11.593	11.206	11.788	11.338	11.059	11.512	11.411	11.488	11.578
Na2O	1.051	0.919	1.094	1.208	1.204	0.963	0.88	1.187	1.283	1.262	1.034	1.111	1.267	1.062	1.48	1.367	1.112
K2O	0.711	0.779	0.86	0.903	0.792	0.752	0.796	0.807	0.872	0.749	0.901	0.679	0.704	0.663	0.948	0.897	0.764
F	0	0	0	0	0	0	0	0	0	0	0	0	0	0	0	0	0
Cl	0.046	0.057	0.06	0.072	0.052	0.051	0.049	0.066	0.061	0.064	0.059	0.062	0.045	0.065	0.072	0.072	0.055
Sum	97.984	97.679	97.875	98.64	97.97	98.101	97.772	97.932	97.683	97.489	97.819	97.659	97.307	97.7	97.685	97.916	97.93
Add data for Plagioclase
Plag	8p_core	8p_rim	8p_core	8p_core	8p_core	8p_core	8p_core	9p_int	9p_int	9p_int	9p_int	8p_core	8p_core	8p_core	9p_int	9p_int	9p_int
XAb	0.615	0.643	0.615	0.615	0.615	0.615	0.615	0.577	0.577	0.577	0.577	0.615	0.615	0.615	0.577	0.577	0.577
X An	0.377	0.349	0.377	0.377	0.377	0.377	0.377	0.408	0.408	0.408	0.408	0.377	0.377	0.377	0.408	0.408	0.408
Do not add data below this row (except where indicated)
Fe2O3,calc	5.64447	5.89808	5.14723	5.64765	5.2759	5.60178	6.23281	5.11501	4.70884	4.98611	6.3012	5.32434	5.05595	5.49155	5.04164	5.11094	4.82769
FeO,calc	10.635	10.0508	11.0415	11.5462	10.9287	10.8325	10.9176	10.8924	11.4919	11.6824	10.9241	10.7391	11.1446	10.9306	10.8525	11.7191	11.867
H2O,calc	2.00911	2.00139	1.99758	1.9976	2.00483	2.00906	1.99365	2.00158	1.99154	1.98706	1.98748	2.00225	1.99639	1.99854	1.98761	1.98301	1.99844
O=F, Cl	0.0103788	0.0128606	0.0135375	0.016245	0.0117325	0.0115069	0.0110556	0.0148913	0.0137631	0.01444	0.0133119	0.0139888	0.0101531	0.0146657	0.016245	0.016245	0.0124094
SUM	100.548	100.258	100.375	101.187	100.492	100.66	100.379	100.431	100.133	99.9612	100.424	100.181	99.7998	100.234	100.161	100.395	100.4
Fe3/Fe* =	0.323213	0.345563	0.295511	0.305619	0.30284	0.317555	0.339366	0.297035	0.269379	0.277479	0.341683	0.308494	0.289882	0.311326	0.29479	0.281829	0.267967
Formula per Holland and Blundy, 1994
T-sites
Si	6.82655	6.79264	6.73095	6.60111	6.7815	6.81732	6.73071	6.73719	6.71913	6.77621	6.69767	6.85449	6.84014	6.86251	6.57903	6.57287	6.81154
Aliv	1.17345	1.20736	1.26905	1.39889	1.2185	1.18268	1.26929	1.26281	1.28087	1.22379	1.30233	1.14551	1.15986	1.13749	1.42097	1.42713	1.18846
Al(total)	1.24804	1.29212	1.33056	1.46533	1.30375	1.24553	1.36549	1.33692	1.34655	1.30193	1.39134	1.22374	1.24405	1.21289	1.50445	1.4872	1.23585
M1,2,3 sites
Alvi	0.0745946	0.0847638	0.0615066	0.0664371	0.0852505	0.0628525	0.0961954	0.0741148	0.0656834	0.0781323	0.0890085	0.0782275	0.0841839	0.0754028	0.0834787	0.060079	0.0473851
Ti	0.160376	0.156584	0.195714	0.220672	0.179598	0.160847	0.159867	0.204027	0.201254	0.187589	0.151254	0.162153	0.164401	0.153156	0.240847	0.229224	0.160355
Fe3+	0.621691	0.650792	0.569821	0.62353	0.582393	0.616683	0.690473	0.564768	0.523325	0.554786	0.69918	0.587685	0.561216	0.606773	0.560177	0.569071	0.534965
Mg	2.79026	2.80882	2.7758	2.62814	2.76632	2.81308	2.65001	2.81049	2.77013	2.73634	2.65101	2.85393	2.83247	2.79607	2.75516	2.68642	2.80745
Mn	0.0789723	0.07514	0.0700301	0.0692195	0.076912	0.0700114	0.06322	0.0656207	0.0645493	0.0795283	0.0733141	0.0749169	0.0804631	0.0764873	0.0616573	0.0728157	0.0738399
Fe2+	1.27411	1.2239	1.32713	1.392	1.30953	1.27653	1.34023	1.28098	1.37506	1.36362	1.33623	1.24309	1.27726	1.29211	1.29868	1.38239	1.376
Ca	0	0	0	0	0	0	0	0	0	0	0	0	0	0	0	0	0
	5	5	5	5	5	5	5	5	5	5	5	5	5	5	5	5	5
M4 site
Fe	0.0276737	0.00859121	0.0313039	0.0246902	0.0311852	0.048763	0.00389518	0.0556065	0.0443212	0.0809689	0.0108659	0.0742419	0.0975361	0.0501106	0.0413992	0.0677404	0.0854138
Ca	1.83502	1.86723	1.85512	1.85278	1.81931	1.83521	1.87721	1.80796	1.83451	1.77534	1.8624	1.7819	1.74787	1.81113	1.80528	1.82128	1.82678
Na	0.137304	0.124178	0.113578	0.122534	0.1495	0.116025	0.118893	0.136437	0.121167	0.143691	0.126735	0.143863	0.154591	0.138764	0.153323	0.110981	0.087807
	2	2	2	2	2	2	2	2	2	2	2	2	2	2	2	2	2
A site
Ca	0	0	0	0	0	0	0	0	0	0	0	0	0	0	0	0	0
Na	0.160955	0.13709	0.19847	0.221099	0.192941	0.157125	0.132287	0.201249	0.24622	0.218104	0.168879	0.172097	0.207771	0.163575	0.270373	0.281187	0.229683
K	0.132762	0.145721	0.161405	0.169017	0.148217	0.140349	0.149496	0.15106	0.164297	0.141286	0.16949	0.127058	0.132481	0.124193	0.178573	0.169321	0.143527
Sum A	0.293717	0.282811	0.359875	0.390117	0.341158	0.297474	0.281783	0.352309	0.410517	0.35939	0.338369	0.299155	0.340252	0.287768	0.448947	0.450509	0.37321
OH site
O	0	0	0	0	0	0	0	0	0	0	0	0	0	0	0	0	0
OH	1.98843	1.98563	1.98485	1.98185	1.98691	1.98718	1.98759	1.98338	1.98456	1.98377	1.98503	1.98439	1.98861	1.98361	1.98176	1.98172	1.98611
F	0	0	0	0	0	0	0	0	0	0	0	0	0	0	0	0	0
Cl	0.0115662	0.0143671	0.0151462	0.0181477	0.0130927	0.0128157	0.0124108	0.0166152	0.0154429	0.0162325	0.0149707	0.0156109	0.0113879	0.0163902	0.0182381	0.01828	0.0138868
	2	2	2	2	2	2	2	2	2	2	2	2	2	2	2	2	2
Sum cations	15.2937	15.2828	15.3599	15.3901	15.3412	15.2975	15.2818	15.3523	15.4105	15.3594	15.3384	15.2992	15.3403	15.2878	15.4489	15.4505	15.3732
Cation CHG	46	46	46	46	46	46	46	46	46	46	46	46	46	46	46	46	46
Fe#	0.408058	0.401372	0.409914	0.437032	0.410094	0.408403	0.434315	0.403526	0.412216	0.422191	0.43563	0.400302	0.406002	0.410741	0.408182	0.429104	0.415581
Mg/Fe2+	2.14341	2.27899	2.04337	1.85512	2.06332	2.12261	1.97155	2.10274	1.95165	1.89419	1.96794	2.16645	2.06028	2.08317	2.05597	1.85253	1.92105
Mg/Fe	1.45063	1.49145	1.43953	1.28816	1.43846	1.44856	1.30248	1.47815	1.42591	1.36859	1.29553	1.49811	1.46304	1.43462	1.44989	1.33043	1.40627
XMg	0.558051	0.561765	0.555159	0.525628	0.553264	0.562615	0.530003	0.562098	0.554026	0.547268	0.530202	0.570786	0.566495	0.559214	0.551032	0.537284	0.56149
XOH	0.994217	0.992816	0.992427	0.990926	0.993454	0.993592	0.993795	0.991692	0.992279	0.991884	0.992515	0.992195	0.994306	0.991805	0.990881	0.99086	0.993057
cm	0.0276737	0.00859121	0.0313039	0.0246902	0.0311852	0.048763	0.00389518	0.0556065	0.0443212	0.0809689	0.0108659	0.0742419	0.0975361	0.0501106	0.0413992	0.0677404	0.0854138
XSi,T1	0.706637	0.698161	0.682737	0.650277	0.695375	0.704331	0.682677	0.684298	0.679784	0.694051	0.674417	0.713623	0.710035	0.715627	0.644757	0.643219	0.702884
XAl,T1	0.293363	0.301839	0.317263	0.349723	0.304625	0.295669	0.317323	0.315702	0.320216	0.305949	0.325583	0.286377	0.289965	0.284373	0.355243	0.356781	0.297116
XAl,M2	0.0372973	0.0423819	0.0307533	0.0332186	0.0426253	0.0314262	0.0480977	0.0370574	0.0328417	0.0390661	0.0445042	0.0391137	0.042092	0.0377014	0.0417393	0.0300395	0.0236926
Xvac,A	0.706283	0.717189	0.640125	0.609883	0.658842	0.702526	0.718217	0.647691	0.589483	0.64061	0.661631	0.700845	0.659748	0.712232	0.551053	0.549491	0.62679
XNa,A	0.160955	0.13709	0.19847	0.221099	0.192941	0.157125	0.132287	0.201249	0.24622	0.218104	0.168879	0.172097	0.207771	0.163575	0.270373	0.281187	0.229683
XNa,M4	0.0686521	0.0620891	0.0567892	0.0612672	0.0747501	0.0580126	0.0594466	0.0682186	0.0605833	0.0718456	0.0633677	0.0719315	0.0772957	0.0693822	0.0766613	0.0554906	0.0439035
XCa,M4	0.917511	0.933615	0.927559	0.926388	0.909657	0.917606	0.938606	0.903978	0.917256	0.88767	0.931199	0.890948	0.873936	0.905563	0.902639	0.910639	0.91339
XK,A	0.132762	0.145721	0.161405	0.169017	0.148217	0.140349	0.149496	0.15106	0.164297	0.141286	0.16949	0.127058	0.132481	0.124193	0.178573	0.169321	0.143527
Ked-tr	0.685593	0.820619	0.450198	0.332684	0.505604	0.690852	0.757622	0.424523	0.309296	0.405483	0.493864	0.658229	0.504343	0.710726	0.225112	0.214398	0.392873
Thermometry based on arbitrary pressure (user may input arbitary pressures in Kb))
P kb (var input)	2	2	2	2	2	2	2	2	2	2	2	2	2	2	2	2	2
T (C) HB1 '94	773.094	755.803	803.468	831.357	787.459	775.099	765.116	810.771	827.716	808.973	797.802	772.739	784.243	769.25	852.784	865.344	814.687
T (C) HB2 '94	765.893	745.192	769.081	787.564	776.177	758.918	754.342	792.201	791.446	793.987	780.645	768.847	778.151	764.373	819.414	805.188	764.458
T (C) BH '90	758.448	757.712	779.824	808.888	768.529	760.515	779.878	790.888	795.018	781.964	799.929	752.182	755.402	750.382	827.171	828.59	773.875
P kb (var input)	8	8	8	8	8	8	8	8	8	8	8	8	8	8	8	8	8
T (C) HB1 '94	706.925	692.587	731.391	756.799	720.024	707.355	702.812	739.975	752.222	738.313	730.695	706.719	716.629	703.513	776.433	784.513	739.045
T (C) HB2 '94	772.589	752.624	774.459	793.34	783.856	764.475	762.776	798.879	797.288	801.098	788.565	775.935	785.827	771.18	826.898	810.424	768.599
T (C) BH '90	670.464	669.79	690.017	716.601	679.684	672.354	690.066	700.137	703.915	691.974	708.407	664.732	667.678	663.085	733.325	734.623	684.575
Results based on Schmidt pressure (used for purposes of calculation)
Pschmidt (kb)	2.93069	3.1405	3.32346	3.96497	3.19584	2.91872	3.48972	3.35376	3.39957	3.18717	3.61277	2.81499	2.91166	2.76338	4.15119	4.06909	2.87263
T (C) HB1 '94	762.83	743.787	787.569	806.94	774.019	764.726	749.647	794.798	810.106	794.992	779.764	763.771	773.97	760.886	825.41	837.47	803.685
T (C) HB2 '94	766.931	746.605	770.268	789.456	777.708	759.769	756.436	793.707	792.809	795.394	782.774	769.809	779.317	765.239	822.097	806.994	765.06
T (C) BH '90	744.8	740.999	760.015	778.664	750.821	747.016	757.579	770.412	773.767	764.158	775.329	740.304	742.073	739.275	793.524	796.186	760.887
Results based on iteration using Anderson and Smith pressure at various thermometers (note: jla prefers HB2 results)
T (C) HB1*	779.237	754.724	816.697	850.704	795.079	782.206	762.292	826.567	854.076	826.194	803.814	780.183	794.412	776.276	885.35	915.287	841.628
P(Kb) HB1*	1.44282	2.10231	0.897378	0.436834	1.32164	1.37031	2.27192	0.659499	-0.101262	0.536035	1.46181	1.32335	1.09727	1.35864	-0.577862	-1.75518	-0.140654		Average T and P			error
T (C) HB2	765.575	745.518	769.074	787.703	775.848	758.762	754.92	791.681	791.044	793.224	780.647	768.327	777.464	763.917	818.808	805.023	764.243		T	777	±	19	degrees C
P(Kb) HB2	1.7149	2.26264	1.99178	2.14412	1.7426	1.83123	2.41144	1.53315	1.58656	1.35692	2.0011	1.56039	1.46296	1.5985	1.51413	1.81043	1.68891		P	1.8	±	0.251437	kbar
T (C) BH	761.501	756.745	784.904	818.423	770.812	764.575	781.809	801.337	807.033	790.74	810.723	755.01	757.669	753.492	847.549	852.232	784.567
P(Kb) BH	1.79153	2.06572	1.65934	1.37341	1.84522	1.72333	1.86979	1.30652	1.20526	1.41329	1.28804	1.80577	1.84475	1.78604	0.678217	0.469228	1.28064
*	HB 1 refers to Holland and Blundy Hbld-Plag thermometry calibration reaction edenite + 4 quartz = tremolite + albite
	HB 2 refers to Holland and Blundy Hbld-Plag thermometry calibration reaction edenite + albite = richterite + anorthite
	BH refers to Blundy and Holland Hbld-Plag thermometry calibration reaction edenite + 4 quartz = tremolite + albite
Temperature based on Ti (Otten, 1984) - warning: semi empirical; best used to determine magmatic versus secondary compositions
T (C) Ti-hbld	738.093	733.528	780.639	810.689	761.236	738.659	737.48	790.649	787.31	770.857	727.11	740.232	742.938	729.4	834.98	820.986	738.067
Iterations for Anderson and Smith/Holland and Blundy
Iteration 1 (using T at Schmidt P)
Pas HB1	1.76676	2.29161	1.6003	1.67526	1.78023	1.72047	2.50711	1.46127	1.12833	1.31634	2.02033	1.64682	1.53389	1.65442	1.33122	0.918452	0.849607
Pas HB2	1.68892	2.24426	1.96781	2.10331	1.7039	1.81284	2.38331	1.48655	1.54603	1.30707	1.95437	1.53171	1.42471	1.57376	1.42367	1.75999	1.67349
Pas BH	2.08406	2.33746	2.16799	2.34851	2.22142	2.03642	2.3619	1.99141	1.96275	1.9683	2.11546	2.05109	2.11117	2.01998	2.16442	2.03064	1.75136
Iteration 2 (using prior P for new T and P)
T (C) HB1	775.666	752.73	808.269	835.392	789.929	778.255	759.85	817.128	838.683	817.025	797.574	776.625	789.496	773.036	861.295	879.915	829.19
P(Kb) HB1	1.51617	2.13793	1.11162	0.897258	1.43888	1.45279	2.31888	0.910845	0.356587	0.777936	1.61364	1.39632	1.20703	1.42335	0.242064	-0.446359	0.203732
T (C) HB2	765.546	745.495	769.053	787.664	775.798	758.745	754.881	791.629	791.004	793.165	780.585	768.293	777.415	763.889	818.695	804.979	764.232
P(Kb) HB2	1.71545	2.26302	1.99221	2.14503	1.74362	1.83154	2.41217	1.53434	1.58746	1.35827	2.00245	1.56104	1.46396	1.59903	1.51721	1.81155	1.68911
T (C) BH	757.215	752.767	777.31	803.527	765.25	759.98	774.461	791.018	795.584	782.439	798.168	751.438	753.777	750.091	824.599	828.11	777.576
P(Kb) BH	1.86991	2.13729	1.82272	1.76179	1.95488	1.80897	2.02676	1.54829	1.48153	1.59605	1.59939	1.86785	1.91407	1.8443	1.35398	1.1892	1.42688
Iteration 3
T (C) HB1	778.429	754.35	814.14	845.06	793.766	781.277	761.805	823.622	848.394	823.365	802.123	779.382	793.179	775.568	875.154	898.301	837.332
P(Kb) HB1	1.45954	2.10905	0.963318	0.609955	1.35186	1.38988	2.28134	0.739095	0.0712009	0.611787	1.50344	1.33992	1.12508	1.37289	-0.221542	-1.10724	-0.0195339
T (C) HB2	765.575	745.518	769.074	787.704	775.849	758.762	754.921	791.682	791.044	793.226	780.648	768.328	777.465	763.918	818.812	805.024	764.243
P(Kb) HB2	1.71489	2.26263	1.99178	2.1441	1.74257	1.83123	2.41142	1.53312	1.58654	1.35688	2.00106	1.56038	1.46293	1.59849	1.51403	1.8104	1.6889
T (C) BH	760.356	755.7	782.478	812.552	769.197	763.322	779.477	797.72	802.891	788.022	806.04	754.108	756.659	752.647	837.275	841.288	782.405
P(Kb) BH	1.81269	2.08471	1.71232	1.52978	1.87746	1.74695	1.92033	1.39276	1.3071	1.47407	1.40646	1.82159	1.86292	1.80065	0.988848	0.804859	1.3265
Iteration 4
T (C) HB1	779.054	754.654	815.921	848.63	794.744	781.988	762.194	825.649	851.984	825.322	803.355	780.002	794.103	776.121	881.054	907.205	840.147
P(Kb) HB1	1.44661	2.10358	0.917462	0.500915	1.32937	1.37493	2.2738	0.684428	-0.037308	0.559502	1.47313	1.32709	1.10427	1.36176	-0.426139	-1.44238	-0.0986337
T (C) HB2	765.575	745.518	769.074	787.703	775.848	758.762	754.92	791.681	791.044	793.224	780.647	768.327	777.464	763.917	818.808	805.023	764.243
P(Kb) HB2	1.7149	2.26264	1.99178	2.14412	1.7426	1.83123	2.41144	1.53316	1.58656	1.35692	2.0011	1.56039	1.46296	1.5985	1.51414	1.81043	1.68891
T (C) BH	761.195	756.47	784.13	816.12	770.343	764.233	781.071	800.073	805.539	789.852	808.983	754.783	757.407	753.282	842.986	847.307	783.899
P(Kb) BH	1.7972	2.07072	1.67631	1.43524	1.85461	1.72979	1.88587	1.33684	1.24223	1.43325	1.33236	1.80978	1.84948	1.78968	0.817802	0.622103	1.29487
Iteration 5
T (C) HB1	779.196	754.711	816.472	849.985	794.997	782.156	762.273	826.294	853.35	825.938	803.694	780.143	794.337	776.243	883.658	911.72	841.144
P(Kb) HB1	1.44365	2.10255	0.903204	0.459116	1.32355	1.37137	2.27228	0.666921	-0.0789863	0.542951	1.46476	1.32417	1.09897	1.3593	-0.51781	-1.61612	-0.126894
T (C) HB2	765.575	745.518	769.074	787.703	775.848	758.762	754.92	791.681	791.044	793.224	780.647	768.327	777.464	763.917	818.808	805.023	764.243
P(Kb) HB2	1.7149	2.26264	1.99178	2.14412	1.7426	1.83123	2.41144	1.53315	1.58656	1.35692	2.0011	1.56039	1.46296	1.5985	1.51413	1.81043	1.68891
T (C) BH	761.422	756.675	784.669	817.575	770.682	764.485	781.586	800.918	806.524	790.464	810.113	754.955	757.603	753.442	845.661	850.17	784.37
P(Kb) BH	1.79299	2.06698	1.6645	1.39626	1.84783	1.72503	1.87465	1.31657	1.21788	1.4195	1.30361	1.80675	1.84593	1.78692	0.736278	0.53362	1.28484
Iteration 6
T (C) HB1	779.229	754.722	816.643	850.504	795.062	782.197	762.289	826.501	853.874	826.133	803.788	780.176	794.397	776.27	884.824	914.06	841.501
P(Kb) HB1	1.44297	2.10235	0.898762	0.443032	1.32204	1.37052	2.27198	0.661303	-0.0950567	0.537701	1.46245	1.3235	1.09762	1.35876	-0.559157	-1.70718	-0.137021
T (C) HB2	765.575	745.518	769.074	787.703	775.848	758.762	754.92	791.681	791.044	793.224	780.647	768.327	777.464	763.917	818.808	805.023	764.243
P(Kb) HB2	1.7149	2.26264	1.99178	2.14412	1.7426	1.83123	2.41144	1.53315	1.58656	1.35692	2.0011	1.56039	1.46296	1.5985	1.51413	1.81043	1.68891
T (C) BH	761.484	756.73	784.846	818.174	770.782	764.555	781.754	801.225	806.894	790.67	810.552	754.999	757.655	753.482	846.936	851.555	784.519
P(Kb) BH	1.79184	2.06598	1.66062	1.38011	1.84582	1.7237	1.87099	1.3092	1.20872	1.41486	1.29241	1.80597	1.845	1.78622	0.697108	0.490413	1.28165
Iteration 7
T (C) HB1*	779.237	754.724	816.697	850.704	795.079	782.206	762.292	826.567	854.076	826.194	803.814	780.183	794.412	776.276	885.35	915.287	841.628
P(Kb) HB1*	1.44282	2.10231	0.897378	0.436834	1.32164	1.37031	2.27192	0.659499	-0.101262	0.536035	1.46181	1.32335	1.09727	1.35864	-0.577862	-1.75518	-0.140654
T (C) HB2	765.575	745.518	769.074	787.703	775.848	758.762	754.92	791.681	791.044	793.224	780.647	768.327	777.464	763.917	818.808	805.023	764.243
P(Kb) HB2	1.7149	2.26264	1.99178	2.14412	1.7426	1.83123	2.41144	1.53315	1.58656	1.35692	2.0011	1.56039	1.46296	1.5985	1.51413	1.81043	1.68891
T (C) BH	761.501	756.745	784.904	818.423	770.812	764.575	781.809	801.337	807.033	790.74	810.723	755.01	757.669	753.492	847.549	852.232	784.567
P(Kb) BH	1.79153	2.06572	1.65934	1.37341	1.84522	1.72333	1.86979	1.30652	1.20526	1.41329	1.28804	1.80577	1.84475	1.78604	0.678217	0.469228	1.28064
Formula per 23 Oxygens (all Fe as FeO)
Atom prop	2.57984	2.57355	2.56965	2.57357	2.57632	2.5814	2.56107	2.5767	2.56228	2.55752	2.55644	2.57626	2.56327	2.5725	2.56082	2.55495	2.56914
T-sites
Si	6.92007	6.89012	6.81537	6.69181	6.86846	6.90996	6.83328	6.82094	6.79645	6.85893	6.80104	6.94319	6.92462	6.95424	6.66013	6.65521	6.89169
Aliv	1.07993	1.10988	1.18463	1.30819	1.13154	1.09004	1.16672	1.17906	1.20355	1.14107	1.19896	1.05681	1.07538	1.04576	1.33987	1.34479	1.10831
Al(total)	1.26514	1.31066	1.34725	1.48547	1.32047	1.26246	1.3863	1.35354	1.36204	1.31782	1.41281	1.23957	1.25941	1.22911	1.523	1.50583	1.25039
M1,2,3 sites
Alvi	0.185218	0.200786	0.16262	0.17728	0.188928	0.172413	0.219573	0.174477	0.1585	0.176749	0.213855	0.182769	0.184032	0.183347	0.183131	0.16104	0.142075
Ti	0.162573	0.158831	0.198168	0.223704	0.181901	0.163032	0.162303	0.206563	0.20357	0.189879	0.153589	0.164251	0.166431	0.155204	0.243816	0.232095	0.162242
Fe3+	0	0	0	0	0	0	0	0	0	0	0	0	0	0	0	0	0
Mg	2.82848	2.84913	2.81061	2.66425	2.80179	2.8513	2.6904	2.84543	2.80201	2.76974	2.69193	2.89086	2.86746	2.83344	2.78913	2.72007	2.84049
Mn	0.0800542	0.0762183	0.0709085	0.0701706	0.0778983	0.0709627	0.0641834	0.0664364	0.0652921	0.0804991	0.0744456	0.0758864	0.0814569	0.0775098	0.0624174	0.0737278	0.0747087
Fe2+	1.74367	1.71503	1.75769	1.86459	1.74948	1.74229	1.86354	1.7071	1.77063	1.78313	1.86618	1.68623	1.70062	1.75049	1.72151	1.81307	1.78049
Ca	0	0	0	0	0	0	0	0	0	0	0	0	0	0	0	0	0
	5	5	5	5	5	5	5	5	5	5	5	5	5	5	5	5	5
M4 site
Fe	0.206155	0.195273	0.194753	0.203666	0.198285	0.226074	0.202062	0.21789	0.194429	0.240659	0.211678	0.243437	0.259304	0.224552	0.202172	0.231428	0.239383
Ca	1.79384	1.80473	1.80525	1.79633	1.80172	1.77393	1.79794	1.78211	1.80557	1.75934	1.78832	1.75656	1.7407	1.77545	1.79783	1.76857	1.76062
Na	0	0	0	0	0	0	0	0	0	0	0	0	0	0	0	0	0
	2	2	2	2	2	2	2	2	2	2	2	2	2	2	2	2	2
A site
Ca	0.0663174	0.0892999	0.0731389	0.0819007	0.0409287	0.086223	0.10788	0.0483194	0.0500521	0.0376716	0.102821	0.0483916	0.0287647	0.0598861	0.0297054	0.0755195	0.0876575
Na	0.302345	0.265018	0.315962	0.348356	0.346832	0.276862	0.255008	0.341884	0.371615	0.366212	0.300177	0.320049	0.366838	0.306381	0.428919	0.397081	0.321225
K	0.134581	0.147813	0.16343	0.17134	0.150118	0.142256	0.151774	0.152938	0.166187	0.143011	0.172106	0.128702	0.134117	0.125853	0.180774	0.171442	0.145216
Sum A	0.503244	0.50213	0.552531	0.601596	0.537879	0.505341	0.514662	0.543141	0.587854	0.546894	0.575104	0.497143	0.52972	0.49212	0.639399	0.644043	0.554099
OH site
O	0	0	0	0	0	0	0	0	0	0	0	0	0	0	0	0	0
OH	1.98843	1.98563	1.98485	1.98185	1.98691	1.98718	1.98759	1.98338	1.98456	1.98377	1.98503	1.98439	1.98861	1.98361	1.98176	1.98172	1.98611
F	0	0	0	0	0	0	0	0	0	0	0	0	0	0	0	0	0
Cl	0.0115662	0.0143671	0.0151462	0.0181477	0.0130927	0.0128157	0.0124108	0.0166152	0.0154429	0.0162325	0.0149707	0.0156109	0.0113879	0.0163902	0.0182381	0.01828	0.0138868
	2	2	2	2	2	2	2	2	2	2	2	2	2	2	2	2	2
Sum cations	15.5032	15.5021	15.5525	15.6016	15.5379	15.5053	15.5147	15.5431	15.5879	15.5469	15.5751	15.4971	15.5297	15.4921	15.6394	15.644	15.5541
Cation CHG	46	46	46	46	46	46	46	46	46	46	46	46	46	46	46	46	46
f1	1.03204	1.03212	1.02877	1.02554	1.02974	1.0319	1.03128	1.02939	1.02644	1.02914	1.02728	1.03245	1.03028	1.03278	1.02306	1.02275	1.02867
f2	1.15606	1.16108	1.17382	1.19549	1.16474	1.15775	1.17074	1.17286	1.17708	1.16636	1.17629	1.15221	1.1553	1.15038	1.20118	1.20207	1.16082
f3	0.995598	0.994082	0.995148	0.99457	0.997279	0.994285	0.992859	0.996789	0.996674	0.997495	0.993192	0.996784	0.998086	0.996023	0.998024	0.994991	0.99419
f4	1.07518	1.05595	1.06474	1.06483	1.0854	1.07518	1.04942	1.09264	1.07781	1.11296	1.05756	1.10806	1.13029	1.08972	1.09437	1.08454	1.08209
f5	1	1	1	1	1	1	1	1	1	1	1	1	1	1	1	1	1
f6	0.977372	0.975516	0.980077	0.97832	0.976929	0.978903	0.973287	0.978656	0.980572	0.978384	0.973964	0.977664	0.977513	0.977595	0.977621	0.980267	0.982551
f7	0.976012	0.976924	0.974716	0.972116	0.974801	0.976366	0.976379	0.974646	0.972658	0.97378	0.973836	0.976026	0.974304	0.976164	0.970332	0.969456	0.973464
f8	0.976817	0.977623	0.977661	0.977001	0.9774	0.975346	0.97712	0.97595	0.977685	0.974272	0.976409	0.974067	0.972902	0.975458	0.977112	0.974951	0.974366
f9	0.6624	0.662256	0.662242	0.661753	0.66212	0.662551	0.661985	0.661995	0.662226	0.662171	0.662161	0.66241	0.662368	0.662513	0.661437	0.661848	0.662931
f10	0.962094	0.962717	0.961789	0.959465	0.961968	0.962124	0.959488	0.962889	0.961508	0.961236	0.959431	0.963343	0.96303	0.961946	0.962576	0.960585	0.961294
smallest f1-5	0.995598	0.994082	0.995148	0.99457	0.997279	0.994285	0.992859	0.996789	0.996674	0.997495	0.993192	0.996784	0.998086	0.996023	0.998024	0.994991	0.99419
largest f6-10	0.977372	0.977623	0.980077	0.97832	0.9774	0.978903	0.97712	0.978656	0.980572	0.978384	0.976409	0.977664	0.977513	0.977595	0.977621	0.980267	0.982551
av f	0.986485	0.985852	0.987613	0.986445	0.987339	0.986594	0.98499	0.987722	0.988623	0.987939	0.9848	0.987224	0.9878	0.986809	0.987822	0.987629	0.98837

## Sheet: TILP
Plagioclase-Hornblende Thermobarometry (temperature by Holland and Blundy, 1994; Blundy and Holland, 1990;
at pressure by Schmidt, 1992 and Anderson and Smith, 1995)
Spreadsheet prepared by Lawford Anderson, University of Southern California (anderson@usc.edu)
References:	Anderson, J. L. 1996. Status of thermobarometry in granitic batholiths: Transactions of the Royal Society of Edinburgh, v. 87, 125-138. [also published in GSA Special Paper 315]
	Anderson, J. L. & Smith, D. R. 1995. The effect of temperature and oxygen fugacity on Al-in-hornblende barometry. AM MINERAL 80, 549-59.
	Blundy, J. D. & Holland, T. J. B. 1990. Calcic amphibole equilibria and a new amphibole-plagioclase geothermometer. CONTRIB MINERAL PETROL 104, 208-24.
	Holland, T. & Blundy, J. 1994. Non-ideal interactions in calcic amphiboles and their bearing on amphibole-plagioclase thermometry. CONTRIB MINERAL PETROL 116, 433-47.
	Johnson, M. C. & Rutherford, M. J. 1989. Experimental calibration of an aluminum-in-hornblende geobarometer with application to Long Valley caldera (California) volcanic rocks. GEOL 17, 837-841.
	Otten, M. T. 1984. The origin of brown hornblende in the Artfjallet gabbro and dolerites. CONTRIB MINERAL PETROL 86, 189-99.
	Schmidt, M. W. 1992. Amphibole composition in tonalite as a function of pressure: an experimental calibration of the Al-in-hornblende barometer. CONTRIB MINERAL PETROL 110, 304-10.
	Schmidt, M. W. 1993. Phase relations and compositions in tonalite as a function of pressure: an experimental study at 650 °C. AMER J SCIENCE 293, 1011-60.
To use this spreadsheet, simply paste in amphibole (wt. % elements, excluding Sum) and plagioclase (mole fraction) analyses in the examples shown below and use the "Save As" option to protect the original. Cells below the data section are not protected and modification could currupt calculations.
	Extend cell formatting as needed, and re-save
	Final P-T Solution - see section below "Results based on iteration using Anderson and Smith pressure at various thermometers"; Note preferred calibration as explained in Anderson (1996).
Add data for elements					B73A 1000 Island Granodiorite, Sierras
Texture	77	76	79	64	78	66	69	80	65	68	67
Specimen	core	core	rim	core	mid	rim	rim	rim	mid	mid	core
SiO2	48.466	48.438	47.587	47.785	47.156	47.605	47.085	46.458	46.917	45.486	45.358
TiO2	0.903	1.011	1.151	1.142	1.174	1.271	1.411	1.35	1.303	2.236	2.226
Al2O3	5.959	6.222	6.653	6.919	6.921	6.96	7.257	7.383	7.552	8.264	8.36
FeO*	14.299	14.377	14.742	14.86	14.766	15.198	14.664	15.17	15.164	15.147	14.708
MgO	14.555	14.046	13.885	13.531	13.648	12.909	13.078	12.926	13.162	12.807	12.987
MnO	0.72	0.691	0.699	0.664	0.732	0.698	0.686	0.653	0.721	0.645	0.578
CaO	11.715	11.841	11.672	11.444	11.603	11.398	11.297	11.859	11.255	10.774	10.694
Na2O	0.853	0.849	1.113	0.939	0.953	0.817	1.132	0.935	1.105	1.607	1.648
K2O	0.505	0.521	0.601	0.674	0.685	0.701	0.7	0.701	0.791	0.821	0.844
F	0	0	0	0	0	0	0	0	0	0	0
Cl	0.06	0.062	0.052	0.08	0.074	0.094	0.102	0.086	0.081	0.089	0.097
Sum	98.035	96.1	98.155	98.038	97.712	97.651	97.412	97.521	98.051	97.876	97.5
Add data for Plagioclase
Plag
XAb	0.738081	0.714602	0.712274	0.694768	0.69119	0.689376	0.685007	0.685007	0.685007	0.685007	0.685007
X An	0.254402	0.276269	0.278508	0.295661	0.300807	0.301978	0.307143	0.307143	0.307143	0.307143	0.307143
Do not add data below this row (except where indicated)
Fe2O3,calc	5.12457	5.41606	5.1523	4.88403	5.94937	3.84327	4.39101	5.87263	5.2558	5.12624	5.44414
FeO,calc	9.68785	9.50357	10.1059	10.4653	9.41268	11.7398	10.7129	9.88574	10.4348	10.5343	9.80929
H2O,calc	2.0286	2.02802	2.02364	2.01689	2.00718	2.00213	1.99602	1.99302	2.00896	1.99628	1.99049
O=F, Cl	0.0135375	0.0139888	0.0117325	0.01805	0.0166963	0.0212088	0.0230138	0.0194038	0.0182757	0.0200807	0.0218857
SUM	100.563	100.615	100.683	100.526	100.299	100.017	99.8249	100.083	100.568	100.366	100.014
Fe3/Fe* =	0.322481	0.338974	0.314482	0.295741	0.362544	0.227544	0.269441	0.348336	0.311873	0.304526	0.333064
Formula per Holland and Blundy, 1994
T-sites
Si	7.02325	7.01457	6.9188	6.95079	6.87936	6.97983	6.90828	6.81563	6.84396	6.67184	6.66023
Aliv	0.976752	0.985434	1.0812	1.04921	1.12064	1.02017	1.09172	1.18437	1.15604	1.32816	1.33977
Al(total)	1.01803	1.06226	1.14037	1.18652	1.19033	1.20306	1.25525	1.27693	1.29875	1.42905	1.4472
M1,2,3 sites
Alvi	0.0412813	0.0768296	0.059169	0.137309	0.0696931	0.182893	0.16353	0.092553	0.142718	0.100889	0.107432
Ti	0.0984111	0.110109	0.125856	0.124929	0.128806	0.14015	0.155693	0.148948	0.142948	0.246658	0.245819
Fe3+	0.558837	0.590235	0.563729	0.534624	0.653145	0.424053	0.484818	0.648343	0.576957	0.565841	0.601578
Mg	3.14336	3.03144	3.00864	2.93329	2.9673	2.82076	2.85963	2.82612	2.86142	2.79961	2.84201
Mn	0.088378	0.0847625	0.0860856	0.0818129	0.0904552	0.0866879	0.0852555	0.0811464	0.0890889	0.0801381	0.0718909
Fe2+	1.06973	1.10662	1.15652	1.18804	1.0906	1.34545	1.25107	1.20289	1.18687	1.20687	1.13127
Ca	0	0	0	0	0	0	0	0	0	0	0
	5	5	5	5	5	5	5	5	5	5	5
M4 site
Fe	0.104369	0.0443794	0.0723079	0.0850804	0.0578203	0.0940994	0.0634581	0.0100278	0.0861497	0.0853979	0.0733481
Ca	1.81902	1.83737	1.81837	1.78367	1.81374	1.79067	1.77601	1.86418	1.75921	1.69332	1.68256
Na	0.0766119	0.118248	0.109325	0.131249	0.128437	0.115233	0.160536	0.125793	0.154642	0.221281	0.244095
	2	2	2	2	2	2	2	2	2	2	2
A site
Ca	0	0	0	0	0	0	0	0	0	0	0
Na	0.16306	0.120142	0.20444	0.133586	0.141133	0.117031	0.161497	0.140171	0.157898	0.235755	0.225106
K	0.0933627	0.0962573	0.11148	0.125079	0.127492	0.131127	0.131029	0.131203	0.147209	0.153636	0.15811
Sum A	0.256422	0.2164	0.31592	0.258665	0.268625	0.248158	0.292526	0.271374	0.305107	0.389391	0.383216
OH site
O	0	0	0	0	0	0	0	0	0	0	0
OH	1.98508	1.98459	1.98703	1.98005	1.98144	1.97643	1.97437	1.97831	1.97972	1.9776	1.97554
F	0	0	0	0	0	0	0	0	0	0	0
Cl	0.0149163	0.015414	0.0129718	0.0199531	0.018559	0.0235745	0.0256324	0.0216875	0.0202789	0.0223993	0.0244582
	2	2	2	2	2	2	2	2	2	2	2
Sum cations	15.2564	15.2164	15.3159	15.2587	15.2686	15.2482	15.2925	15.2714	15.3051	15.3894	15.3832
Cation CHG	46	46	46	46	46	46	46	46	46	46	46
Fe#	0.355379	0.364835	0.373357	0.381298	0.377776	0.397835	0.386211	0.397078	0.39266	0.398931	0.388579
Mg/Fe2+	2.67726	2.63374	2.44837	2.30401	2.58382	1.95947	2.1754	2.33003	2.24774	2.16644	2.35927
Mg/Fe	1.8139	1.74097	1.6784	1.62262	1.64707	1.5136	1.58926	1.5184	1.54673	1.5067	1.57348
XMg	0.628673	0.606288	0.601727	0.586657	0.593461	0.564152	0.571926	0.565225	0.572283	0.559922	0.568402
XOH	0.992542	0.992293	0.993514	0.990023	0.990721	0.988213	0.987184	0.989156	0.989861	0.9888	0.987771
cm	0.104369	0.0443794	0.0723079	0.0850804	0.0578203	0.0940994	0.0634581	0.0100278	0.0861497	0.0853979	0.0733481
XSi,T1	0.755812	0.753642	0.729699	0.737698	0.719841	0.744957	0.727069	0.703907	0.710991	0.667961	0.665058
XAl,T1	0.244188	0.246358	0.270301	0.262302	0.280159	0.255043	0.272931	0.296093	0.289009	0.332039	0.334942
XAl,M2	0.0206407	0.0384148	0.0295845	0.0686543	0.0348466	0.0914467	0.0817652	0.0462765	0.0713591	0.0504446	0.0537161
Xvac,A	0.743578	0.7836	0.68408	0.741335	0.731375	0.751842	0.707474	0.728626	0.694893	0.610609	0.616784
XNa,A	0.16306	0.120142	0.20444	0.133586	0.141133	0.117031	0.161497	0.140171	0.157898	0.235755	0.225106
XNa,M4	0.0383059	0.0591241	0.0546624	0.0656243	0.0642184	0.0576163	0.080268	0.0628967	0.0773212	0.110641	0.122048
XCa,M4	0.90951	0.918686	0.909184	0.891836	0.906871	0.895334	0.888003	0.932089	0.879604	0.846661	0.841278
XK,A	0.0933627	0.0962573	0.11148	0.125079	0.127492	0.131127	0.131029	0.131203	0.147209	0.153636	0.15811
Ked-tr	1.09875	1.50378	0.678591	1.14365	0.970655	1.36435	0.843117	0.892795	0.78219	0.376429	0.393055
Thermometry based on arbitrary pressure (user may input arbitary pressures in Kb))
P kb (var input)	2	2	2	2	2	2	2	2	2	2	2
T (C) HB1 '94	731.925	708.075	758.981	707.741	741.621	682.049	720.09	745.554	732.328	796.498	793.32
T (C) HB2 '94	674.737	695.968	714.514	700.908	728.008	677.011	715.793	725.928	726.716	787.388	791.037
T (C) BH '90	683.798	690.893	712.167	709.453	725.823	704.411	721.116	741.156	735.045	772.062	774.559
P kb (var input)	8	8	8	8	8	8	8	8	8	8	8
T (C) HB1 '94	665.311	648.508	690.557	654.055	677.751	635.376	667.839	684.085	676.693	728.538	726.778
T (C) HB2 '94	678.178	702.652	719.586	713	734.092	693.027	730.444	733.942	739.385	796.494	800.81
T (C) BH '90	602.18	608.67	628.13	625.647	640.621	621.036	636.315	654.646	649.057	682.916	685.2
Results based on Schmidt pressure (used for purposes of calculation)
Pschmidt (kb)	1.83584	2.04637	2.41818	2.63782	2.65597	2.71659	2.96501	3.06817	3.17207	3.79226	3.87868
T (C) HB1 '94	733.748	707.615	754.212	702.034	734.638	676.474	711.686	734.611	721.46	776.198	772.485
T (C) HB2 '94	674.642	696.019	714.868	702.194	728.674	678.924	718.15	727.355	729.191	790.108	794.097
T (C) BH '90	686.031	690.257	706.31	700.544	716.508	694.454	707.477	725.755	718.248	745.433	746.579
Results based on iteration using Anderson and Smith pressure at various thermometers (note: jla prefers HB2 results)
T (C) HB1*	741.491	710.756	767.868	704.469	743.092	676.567	715.315	743.13	726.915	799.763	794.231
P(Kb) HB1*	1.13842	1.72991	1.22069	2.36571	1.86182	2.70468	2.54824	2.23662	2.5838	1.71108	1.91737		Average T and P			error
T (C) HB2	674.644	695.835	714.548	701.706	728.096	678.844	717.076	726.585	727.917	787.394	791.026		T	726.903	±	36.4118	degree C
P(Kb) HB2	1.83809	1.88133	2.03956	2.39582	2.08631	2.68683	2.52542	2.49172	2.56913	2.004	1.99325		P	2.26734	±	0.294136	kbar
T (C) BH	687.212	692.053	711.031	704.322	723.747	697.194	712.941	736.126	726.616	764.764	766.69
P(Kb) BH	1.74903	1.91531	2.08113	2.36733	2.14618	2.51943	2.57839	2.34877	2.58815	2.49056	2.52769
*	HB 1 refers to Holland and Blundy Hbld-Plag thermometry calibration reaction edenite + 4 quartz = tremolite + albite
	HB 2 refers to Holland and Blundy Hbld-Plag thermometry calibration reaction edenite + albite = richterite + anorthite
	BH refers to Blundy and Holland Hbld-Plag thermometry calibration reaction edenite + 4 quartz = tremolite + albite
Temperature based on Ti (Otten, 1984) - warning: semi empirical; best used to determine magmatic versus secondary compositions
T (C) Ti-hbld	663.487	677.571	696.53	695.415	700.082	713.741	732.455	724.333	717.109	841.976	840.966
**********************************************************************************************************************************
Data below used for iterative calculations
Iterations for Anderson and Smith/Holland and Blundy
Iteration 1 (using T at Schmidt P)
Pas HB1	1.24796	1.7641	1.46414	2.39229	1.99181	2.70539	2.59405	2.37222	2.66139	2.2527	2.40712
Pas HB2	1.8381	1.87963	2.0357	2.39057	2.07818	2.6862	2.51132	2.4806	2.55033	1.94136	1.92056
Pas BH	1.75823	1.93082	2.13449	2.40819	2.2406	2.54709	2.64513	2.50362	2.70536	2.85569	2.91366
Iteration 2 (using prior P for new T and P)
T (C) HB1	740.275	710.417	765.092	704.231	741.708	676.562	714.916	741.741	726.195	793.635	788.804
P(Kb) HB1	1.15612	1.73367	1.27205	2.36834	1.8837	2.70472	2.55336	2.25935	2.59425	1.85857	2.04509
T (C) HB2	674.644	695.834	714.545	701.695	728.088	678.843	717.042	726.57	727.878	787.299	790.908
P(Kb) HB2	1.83809	1.88135	2.0396	2.39593	2.08642	2.68684	2.52587	2.49193	2.56972	2.00617	1.99603
T (C) BH	687.087	691.841	710.283	703.751	722.406	696.809	711.998	733.895	724.936	759.348	760.952
P(Kb) BH	1.75001	1.91717	2.08976	2.37362	2.16415	2.52336	2.59018	2.38322	2.61237	2.59755	2.64296
Iteration 3
T (C) HB1	741.295	710.719	767.283	704.445	742.859	676.567	715.271	742.897	726.818	798.099	792.819
P(Kb) HB1	1.14129	1.73033	1.23159	2.36597	1.86552	2.70468	2.54881	2.24044	2.58521	1.75158	1.95094
T (C) HB2	674.644	695.835	714.548	701.706	728.096	678.844	717.077	726.585	727.919	787.397	791.03
P(Kb) HB2	1.83809	1.88133	2.03956	2.39582	2.08631	2.68683	2.5254	2.49171	2.56912	2.00392	1.99314
T (C) BH	687.199	692.028	710.91	704.234	723.492	697.139	712.775	735.631	726.269	763.183	764.983
P(Kb) BH	1.74913	1.91553	2.08253	2.3683	2.14961	2.51999	2.58048	2.35647	2.59318	2.52217	2.5624
Iteration 4
T (C) HB1	741.459	710.752	767.744	704.467	743.053	676.567	715.31	743.091	726.902	799.311	793.864
P(Kb) HB1	1.13888	1.72996	1.22299	2.36574	1.86244	2.70468	2.5483	2.23726	2.58399	1.72211	1.92613
T (C) HB2	674.644	695.835	714.548	701.706	728.096	678.844	717.076	726.585	727.917	787.394	791.026
P(Kb) HB2	1.83809	1.88133	2.03956	2.39582	2.08631	2.68683	2.52542	2.49172	2.56914	2.004	1.99325
T (C) BH	687.211	692.05	711.011	704.309	723.698	697.186	712.912	736.016	726.544	764.304	766.183
P(Kb) BH	1.74904	1.91534	2.08135	2.36748	2.14683	2.51951	2.57876	2.35048	2.58919	2.49981	2.53804
Iteration 5
T (C) HB1	741.486	710.756	767.842	704.469	743.086	676.567	715.315	743.124	726.913	799.645	794.139
P(Kb) HB1	1.13849	1.72992	1.22116	2.36571	1.86192	2.70468	2.54825	2.23672	2.58383	1.71396	1.91957
T (C) HB2	674.644	695.835	714.548	701.706	728.096	678.844	717.076	726.585	727.917	787.394	791.026
P(Kb) HB2	1.83809	1.88133	2.03956	2.39582	2.08631	2.68683	2.52542	2.49172	2.56913	2.004	1.99325
T (C) BH	687.212	692.053	711.028	704.32	723.738	697.192	712.936	736.103	726.601	764.636	766.546
P(Kb) BH	1.74903	1.91531	2.08116	2.36736	2.1463	2.51944	2.57846	2.34914	2.58836	2.49314	2.53063
Iteration 6
T (C) HB1	741.49	710.756	767.863	704.469	743.091	676.567	715.315	743.129	726.914	799.737	794.212
P(Kb) HB1	1.13843	1.72991	1.22077	2.36571	1.86183	2.70468	2.54824	2.23663	2.5838	1.7117	1.91783
T (C) HB2	674.644	695.835	714.548	701.706	728.096	678.844	717.076	726.585	727.917	787.394	791.026
P(Kb) HB2	1.83809	1.88133	2.03956	2.39582	2.08631	2.68683	2.52542	2.49172	2.56913	2.004	1.99325
T (C) BH	687.212	692.053	711.03	704.322	723.745	697.193	712.94	736.122	726.613	764.735	766.656
P(Kb) BH	1.74903	1.91531	2.08113	2.36734	2.1462	2.51943	2.5784	2.34884	2.58819	2.49115	2.52838
Iteration 7
T (C) HB1*	741.491	710.756	767.868	704.469	743.092	676.567	715.315	743.13	726.915	799.763	794.231
P(Kb) HB1*	1.13842	1.72991	1.22069	2.36571	1.86182	2.70468	2.54824	2.23662	2.5838	1.71108	1.91737
T (C) HB2	674.644	695.835	714.548	701.706	728.096	678.844	717.076	726.585	727.917	787.394	791.026
P(Kb) HB2	1.83809	1.88133	2.03956	2.39582	2.08631	2.68683	2.52542	2.49172	2.56913	2.004	1.99325
T (C) BH	687.212	692.053	711.031	704.322	723.747	697.194	712.941	736.126	726.616	764.764	766.69
P(Kb) BH	1.74903	1.91531	2.08113	2.36733	2.14618	2.51943	2.57839	2.34877	2.58815	2.49056	2.52769
Formula per 23 Oxygens (all Fe as FeO)
Atom prop	2.60925	2.60917	2.60033	2.60079	2.58645	2.58649	2.58129	2.57226	2.59099	2.5774	2.57261
T-sites
Si	7.10962	7.10574	7.00464	7.03253	6.97845	7.04477	6.98186	6.91306	6.93089	6.75494	6.74849
Aliv	0.890379	0.894258	0.995363	0.967474	1.02155	0.955229	1.01814	1.08694	1.06911	1.24506	1.25151
Al(total)	1.03055	1.07607	1.15452	1.20047	1.20748	1.21426	1.26863	1.29518	1.31525	1.44684	1.46638
M1,2,3 sites
Alvi	0.140173	0.181812	0.159159	0.232995	0.185923	0.25903	0.250487	0.208243	0.246146	0.201778	0.214864
Ti	0.0996214	0.11154	0.127417	0.126398	0.130661	0.141454	0.157352	0.151077	0.144763	0.24973	0.249077
Fe3+	0	0	0	0	0	0	0	0	0	0	0
Mg	3.18202	3.07084	3.04596	2.96778	3.01004	2.84701	2.89009	2.86653	2.89776	2.83447	2.87967
Mn	0.0894649	0.0858642	0.0871536	0.0827749	0.091758	0.0874945	0.0861636	0.0823065	0.0902205	0.0811361	0.0728436
Fe2+	1.48872	1.54994	1.58031	1.59005	1.58162	1.66501	1.61591	1.69185	1.62111	1.63288	1.58354
Ca	0	0	0	0	0	0	0	0	0	0	0
	5	5	5	5	5	5	5	5	5	5	5
M4 site
Fe	0.265527	0.21393	0.234496	0.238947	0.245896	0.215931	0.202607	0.196018	0.252368	0.248365	0.246584
Ca	1.73447	1.78607	1.7655	1.76105	1.7541	1.78407	1.79492	1.80398	1.74763	1.71441	1.70485
Na	0	0	0	0	0	0	0.00246924	0	0	0.0372256	0.0485634
	2	2	2	2	2	2	2	2	2	2	2
A site
Ca	0.106917	0.0751846	0.0754243	0.0435919	0.0857631	0.0232599	0	0.0868469	0.0339213	0	0
Na	0.242619	0.241489	0.317657	0.267949	0.273452	0.234424	0.322994	0.269767	0.31651	0.425503	0.426855
K	0.0945109	0.0975084	0.112863	0.12655	0.129328	0.132347	0.132424	0.133079	0.149079	0.155549	0.160205
Sum A	0.444047	0.414182	0.505945	0.43809	0.488544	0.390031	0.455418	0.489692	0.499511	0.581052	0.58706
OH site
O	0	0	0	0	0	0	0	0	0	0	0
OH	1.98508	1.98459	1.98703	1.98005	1.98144	1.97643	1.97437	1.97831	1.97972	1.9776	1.97554
F	0	0	0	0	0	0	0	0	0	0	0
Cl	0.0149163	0.015414	0.0129718	0.0199531	0.018559	0.0235745	0.0256324	0.0216875	0.0202789	0.0223993	0.0244582
	2	2	2	2	2	2	2	2	2	2	2
Sum cations	15.444	15.4142	15.5059	15.4381	15.4885	15.39	15.4554	15.4897	15.4995	15.5811	15.5871
Cation CHG	46	46	46	46	46	46	46	46	46	46	46
f1	1.036	1.03801	1.03186	1.0364	1.03302	1.03963	1.03524	1.03294	1.03229	1.02689	1.02649
f2	1.12524	1.12585	1.1421	1.13757	1.14639	1.13559	1.14583	1.15723	1.15425	1.18432	1.18545
f3	0.992923	0.995013	0.994997	0.997102	0.994315	0.998452	1.00016	0.994244	0.997744	1.00249	1.00325
f4	1.08614	1.07454	1.08641	1.10825	1.08704	1.10661	1.11425	1.05774	1.12262	1.16658	1.17312
f5	1	1	1	1	1	1	1	1	1	1	1
f6	0.98278	0.977778	0.980493	0.9717	0.977287	0.968637	0.96964	0.97463	0.97015	0.975398	0.973844
f7	0.977228	0.979325	0.974464	0.979653	0.976612	0.983111	0.978921	0.976778	0.977171	0.972416	0.97233
f8	0.972445	0.976242	0.974725	0.974398	0.973887	0.976095	0.97708	0.977568	0.973411	0.973705	0.973836
f9	0.663719	0.663065	0.663147	0.662259	0.662781	0.661759	0.661669	0.66226	0.661875	0.661139	0.660988
f10	0.967637	0.966306	0.965646	0.965434	0.965617	0.963804	0.964872	0.963221	0.964759	0.964503	0.965575
smallest f1-5	0.992923	0.995013	0.994997	0.997102	0.994315	0.998452	1	0.994244	0.997744	1	1
largest f6-10	0.98278	0.979325	0.980493	0.979653	0.977287	0.983111	0.978921	0.977568	0.977171	0.975398	0.973844
av f	0.987851	0.987169	0.987745	0.988378	0.985801	0.990781	0.98946	0.985906	0.987457	0.987699	0.986922

## Sheet: KC-HD
Plagioclase-Hornblende Thermobarometry (temperature by Holland and Blundy, 1994; Blundy and Holland, 1990;
at pressure by Schmidt, 1992 and Anderson and Smith, 1995)
Spreadsheet prepared by Lawford Anderson, University of Southern California (anderson@usc.edu)
References:	Anderson, J. L. 1996. Status of thermobarometry in granitic batholiths: Transactions of the Royal Society of Edinburgh, v. 87, 125-138. [also published in GSA Special Paper 315]
	Anderson, J. L. & Smith, D. R. 1995. The effect of temperature and oxygen fugacity on Al-in-hornblende barometry. AM MINERAL 80, 549-59.
	Blundy, J. D. & Holland, T. J. B. 1990. Calcic amphibole equilibria and a new amphibole-plagioclase geothermometer. CONTRIB MINERAL PETROL 104, 208-24.
	Holland, T. & Blundy, J. 1994. Non-ideal interactions in calcic amphiboles and their bearing on amphibole-plagioclase thermometry. CONTRIB MINERAL PETROL 116, 433-47.
	Johnson, M. C. & Rutherford, M. J. 1989. Experimental calibration of an aluminum-in-hornblende geobarometer with application to Long Valley caldera (California) volcanic rocks. GEOL 17, 837-841.
	Otten, M. T. 1984. The origin of brown hornblende in the Artfjallet gabbro and dolerites. CONTRIB MINERAL PETROL 86, 189-99.
	Schmidt, M. W. 1992. Amphibole composition in tonalite as a function of pressure: an experimental calibration of the Al-in-hornblende barometer. CONTRIB MINERAL PETROL 110, 304-10.
	Schmidt, M. W. 1993. Phase relations and compositions in tonalite as a function of pressure: an experimental study at 650 °C. AMER J SCIENCE 293, 1011-60.
To use this spreadsheet, simply paste in amphibole (wt. % elements, excluding Sum) and plagioclase (mole fraction) analyses in the examples shown below and use the "Save As" option to protect the original. Cells below the data section are not protected and modification could currupt calculations.
	Extend cell formatting as needed, and re-save
	Final P-T Solution - see section below "Results based on iteration using Anderson and Smith pressure at various thermometers"; Note preferred calibration as explained in Anderson (1996).
Add data for elements				KCL-536
Texture
Sample	AB	AB	AB	AB	AB	AB	AB	AB	AB	AB	AB	AB	AB	AB	AB	AB	AB	AB	AB	AB	AB	AB	AB	AB	AB	AB	AB	AB	AB	AB	AB	AB	AB	AB	AB	AB	AB	AB	AB	AB	AB	AB	AB	AB	AB	AB	AB	AB
Specimen	2	3	4	5	6	7	8	9	10	11	13	14	15	16	17	18	45	46	57	58	60	61	63	67	68	69	70	71	72	73	74	75	77	78	79	81	82	83	84	85	86	87	88	89	90	91	92	93
SiO2	47.7995	47.0328	47.3865	48.1313	47.5726	46.4169	48.7207	47.6033	46.6639	47.0311	46.7909	47.2605	46.5621	47.3617	49.2475	48.1746	47.6414	48.263	47.4417	49.0305	49.1937	48.8901	48.0825	47.2494	47.7034	49.8683	48.3063	46.2964	48.8481	48.1891	47.225	49.8636	47.173	47.1522	47.6217	47.2781	49.1089	49.3963	48.2367	48.0215	48.0483	47.8703	48.9573	47.6281	49.0605	48.3012	49.1834	46.8923
TiO2	0.772949	0.941789	0.626169	0.737717	0.578903	1.28743	0.810024	0.9708	1.07529	0.9597	1.08225	1.04906	1.04401	0.99375	0.701335	0.827918	1.0001	0.972964	0.864297	0.740809	0.615304	0.648239	0.677489	0.591116	0.639273	0.320131	0.628204	0.642238	0.462601	0.861963	0.944224	0.507721	0.758536	0.813701	0.798633	0.675194	0.386246	0.472513	0.52868	0.65306	0.701196	0.652026	0.452395	0.700143	0.524593	0.729197	0.460376	0.747216
Al2O3	7.02597	7.44167	7.2896	6.41693	7.04902	7.73557	5.22913	6.99223	7.78447	7.3266	7.75797	7.36583	8.06132	6.74895	5.66074	6.89422	6.64619	6.3322	6.60356	5.85518	5.97049	5.85709	6.4197	6.67896	6.99201	5.24212	6.40737	8.45776	6.3805	6.86	6.91846	5.28487	7.53497	7.03854	7.19423	7.58543	6.08103	5.43718	6.43134	6.58157	5.52538	6.6033	5.65863	7.65486	5.90729	6.65857	5.58931	7.56706
FeO*	16.265	17.0086	17.2587	15.7019	16.3984	16.4717	14.8695	15.5915	16.3944	16.425	16.0988	16.5319	15.96	15.3871	14.1768	15.4134	16.4058	16.3779	15.7113	14.9758	15.489	16.203	16.3105	16.9256	16.7515	15.4177	16.2411	17.3273	16.3382	16.4249	16.9619	15.9688	17.0363	17.0371	17.2041	17.1993	15.8742	15.6591	16.1407	16.1225	16.0524	16.2544	15.5153	16.3238	15.5033	16.0884	15.8236	17.1577
MgO	12.7029	12.3401	11.9825	12.9533	12.6762	11.2912	13.8936	13.0478	12.5405	12.7405	12.2498	12.8094	12.1759	13.2153	13.6596	13.3032	12.1954	12.7397	13.062	13.3833	13.6264	13.108	12.8976	11.9804	12.0142	13.7039	12.8614	11.0555	13.0273	12.8275	11.3853	13.6723	11.921	12.2095	12.2777	11.8115	13.2827	13.5142	12.8885	12.555	12.5927	12.6163	13.4115	11.9961	13.3642	12.8838	13.3331	12.0751
MnO	0.536	0.569	0.494	0.557	0.551	0.555	0.49	0.541	0.525	0.481	0.471	0.527	0.477	0.497	0.54	0.46	0.572	0.515	0.494	0.504	0.502	0.537	0.563	0.48	0.548	0.56	0.55	0.532	0.514	0.545	0.584	0.551	0.554	0.543	0.538	0.491	0.506	0.573	0.539	0.506	0.549	0.529	0.538	0.5	0.514	0.507	0.503	0.524
CaO	12.3059	12.1699	12.4806	12.3058	12.421	12.0014	12.5758	12.2917	12.181	12.3005	12.3974	12.2909	11.844	12.6054	12.7773	12.6929	12.3373	12.403	12.4787	12.2874	12.3517	12.197	12.1449	12.2463	12.1368	12.4207	12.4214	11.7833	12.472	12.157	12.1178	12.4604	12.2468	12.1667	12.2031	12.1709	12.3771	12.3159	12.3501	12.2176	12.2823	12.2515	12.3298	11.8482	12.4454	12.2909	12.4226	12.1455
Na2O	0.78	0.818	0.83	0.708	0.727	0.879	0.753	0.983	1.07	0.957	0.924	0.943	1.014	0.82	0.551	0.737	0.845	0.747	0.793	0.826	0.707	0.781	0.802	0.875	0.831	0.53	0.855	0.895	0.601	0.959	1.003	0.648	0.772	0.924	0.847	0.897	0.717	0.739	0.759	0.97	0.81	0.797	0.704	0.744	0.614	0.965	0.694	0.991
K2O	0.585861	0.6664	0.528891	0.524224	0.500768	0.833123	0.382132	0.630337	0.773489	0.698134	0.749277	0.730207	0.743079	0.587586	0.436635	0.607928	0.809826	0.741087	0.548354	0.486596	0.399903	0.445359	0.489751	0.489898	0.547652	0.342388	0.544986	0.647667	0.39013	0.614913	0.686362	0.354255	0.63085	0.614518	0.645203	0.668065	0.421341	0.380625	0.526439	0.517666	0.43757	0.554415	0.413751	0.604913	0.434606	0.569284	0.398095	0.750181
F	0	0	0	0	0	0	0	0	0	0	0	0	0	0	0	0	0	0	0	0	0	0	0	0	0	0	0	0	0	0	0	0	0	0	0	0	0	0	0	0	0	0	0	0	0	0	0	0
Cl	0	0	0	0	0	0	0	0	0	0	0	0	0	0	0	0	0	0	0	0.004	0	0	0.004	0	0.004	0	0	0	0	0.004	0	0	0	0.004	0	0	0	0.004	0	0	0	0	0.004	0	0	0	0	0.004
Sum	98.774	98.9883	98.877	98.0361	98.4749	97.4713	97.724	98.6518	99.0081	98.9195	98.5213	99.5078	97.8814	98.2167	97.7508	99.1112	98.453	99.0919	97.9969	98.0935	98.8555	98.6668	98.3914	97.5167	98.1678	98.4053	98.8158	97.6372	99.0338	99.4434	97.8261	99.311	98.6274	98.5032	99.3297	98.7765	98.7545	98.4918	98.4005	98.1449	96.9988	98.1281	97.9847	98.0001	98.368	98.9934	98.4076	98.8541
Add data for Plagioclase
Plag	8	8	8	8	8	8	9	9	9	9	9	9	9	10	10	10	3	3	6	6	6	6	6	6	6	6	6	6	6	6	6	6	7	7	7	7	7	7	7	7	7	7	7	7	7	7	7	7
XAb	0.714072	0.714072	0.714072	0.714072	0.714072	0.714072	0.682921	0.682921	0.682921	0.682921	0.682921	0.682921	0.682921	0.735037	0.735037	0.735037	0.638832	0.638832	0.723976	0.723976	0.723976	0.723976	0.723976	0.723976	0.723976	0.723976	0.723976	0.723976	0.723976	0.723976	0.723976	0.723976	0.727578	0.727578	0.727578	0.727578	0.727578	0.727578	0.727578	0.727578	0.727578	0.727578	0.727578	0.727578	0.727578	0.727578	0.727578	0.727578
X An	0.279797	0.279797	0.279797	0.279797	0.279797	0.279797	0.311226	0.311226	0.311226	0.311226	0.311226	0.311226	0.311226	0.256261	0.256261	0.256261	0.353964	0.353964	0.266333	0.266333	0.266333	0.266333	0.266333	0.266333	0.266333	0.266333	0.266333	0.266333	0.266333	0.266333	0.266333	0.266333	0.26455	0.26455	0.26455	0.26455	0.26455	0.26455	0.26455	0.26455	0.26455	0.26455	0.26455	0.26455	0.26455	0.26455	0.26455	0.26455
Do not add data below this row (except where indicated)
Fe2O3,calc	6.02594	6.85589	6.00384	5.59897	6.73257	3.46054	4.22143	5.38482	5.9911	6.35366	4.86978	6.49291	4.99685	5.83409	4.07062	5.6138	4.19972	5.11479	6.06602	4.25243	5.82062	5.73358	6.35391	5.44066	5.16609	5.29908	5.55987	5.37996	6.24862	5.68172	3.41618	5.69521	5.95815	6.11758	6.31263	5.46701	5.90187	5.71708	5.93522	4.73277	4.72309	5.62992	5.74264	4.33872	5.50138	5.14846	5.6842	6.06914
FeO,calc	10.8428	10.8396	11.8564	10.6638	10.3404	13.3579	11.071	10.7462	11.0035	10.7079	11.7169	10.6895	11.4638	10.1375	10.514	10.3621	12.6268	11.7756	10.253	11.1494	10.2516	11.0438	10.5932	12.03	12.103	10.6495	11.2383	12.4864	10.7156	11.3124	13.888	10.8442	11.6751	11.5324	11.5239	12.28	10.5636	10.5148	10.8001	11.8638	11.8025	11.1885	10.348	12.4197	10.5531	11.4557	10.7089	11.6966
H2O,calc	2.03993	2.03351	2.03134	2.03139	2.03208	2.00442	2.0324	2.04007	2.03536	2.03545	2.0297	2.04706	2.02045	2.03112	2.04312	2.05434	2.02671	2.04389	2.0254	2.0417	2.05614	2.0435	2.03225	2.00614	2.02303	2.05076	2.04124	2.00539	2.05159	2.05168	2.00939	2.06274	2.02792	2.02215	2.04158	2.02997	2.05021	2.04551	2.03498	2.02897	2.00492	2.02698	2.03485	2.02836	2.04505	2.04695	2.04282	2.02643
O=F, Cl	0	0	0	0	0	0	0	0	0	0	0	0	0	0	0	0	0	0	0	0.000902502	0	0	0.000902502	0	0.000902502	0	0	0	0	0.000902502	0	0	0	0.000902502	0	0	0	0.000902502	0	0	0	0	0.000902502	0	0	0	0	0.000902502
SUM	101.418	101.709	101.51	100.628	101.182	99.8224	100.179	101.231	101.644	101.591	101.039	102.205	100.402	100.832	100.202	101.728	100.9	101.648	100.63	100.56	101.495	101.285	101.059	100.068	100.708	100.987	101.414	100.182	101.711	102.063	100.178	101.944	101.252	101.137	102.004	101.354	101.396	101.109	101.03	100.648	99.4769	100.719	100.594	100.463	100.964	101.556	101.02	101.488
Fe3/Fe* =	0.333366	0.3627	0.313021	0.320855	0.369429	0.189042	0.255455	0.310767	0.328824	0.348073	0.272188	0.353402	0.281719	0.341168	0.258366	0.327724	0.230343	0.281009	0.347412	0.255504	0.338141	0.318407	0.35053	0.289241	0.277499	0.309267	0.308035	0.279383	0.344138	0.311265	0.181225	0.320915	0.314694	0.3231	0.330164	0.286016	0.334541	0.328519	0.330877	0.264141	0.264751	0.311662	0.333045	0.239162	0.3193	0.28795	0.323233	0.318288
Formula per Holland and Blundy, 1994
T-sites
Si	6.92495	6.82162	6.89411	7.00905	6.90672	6.88463	7.11472	6.90656	6.77597	6.82309	6.83132	6.81584	6.82658	6.89402	7.15686	6.93777	6.97683	6.99382	6.92105	7.12365	7.07498	7.07563	6.983	6.9687	6.97883	7.19939	7.00167	6.83167	7.03352	6.94423	6.98806	7.15077	6.87521	6.88545	6.88901	6.89173	7.08156	7.13876	7.00657	7.01578	7.10309	6.98547	7.11142	6.96694	7.09893	6.98849	7.12129	6.83404
Aliv	1.07505	1.17838	1.10589	0.990946	1.09328	1.11537	0.885278	1.09344	1.22403	1.17691	1.16868	1.18416	1.17342	1.10598	0.843141	1.06223	1.02317	1.00618	1.07895	0.876347	0.925021	0.924369	1.017	1.0313	1.02117	0.80061	0.998328	1.16833	0.966481	1.05577	1.01194	0.849231	1.12479	1.11455	1.11099	1.10827	0.918437	0.861236	0.993425	0.98422	0.896911	1.01453	0.888585	1.03306	0.901075	1.01151	0.878711	1.16596
Al(total)	1.20002	1.27246	1.2503	1.10166	1.20651	1.35265	0.900246	1.19599	1.33262	1.2531	1.3353	1.25236	1.39337	1.15816	0.969838	1.17051	1.14745	1.08179	1.13574	1.00292	1.01231	0.999342	1.09915	1.16132	1.20593	0.892206	1.09488	1.47137	1.0831	1.16543	1.20693	0.893492	1.29468	1.21171	1.22694	1.30357	1.03379	0.92638	1.10133	1.13359	0.962984	1.136	0.96903	1.32009	1.00771	1.13578	0.954081	1.30014
M1,2,3 sites
Alvi	0.124963	0.0940816	0.144407	0.110711	0.113235	0.237281	0.0149679	0.102546	0.108598	0.0761922	0.166619	0.068206	0.219949	0.052177	0.126697	0.10828	0.12428	0.0756127	0.056787	0.12657	0.0872877	0.0749733	0.0821469	0.130015	0.184756	0.0915956	0.0965485	0.303048	0.116614	0.109659	0.19499	0.0442604	0.169887	0.0971651	0.115953	0.195303	0.115356	0.0651441	0.107904	0.149374	0.0660724	0.121474	0.0804457	0.287034	0.106636	0.124264	0.0753699	0.134188
Ti	0.0842169	0.10273	0.0685126	0.0807935	0.0632086	0.143609	0.0889606	0.105928	0.117428	0.10471	0.11883	0.113783	0.115115	0.108787	0.0766514	0.0896695	0.110147	0.106036	0.0948266	0.0809465	0.0665519	0.0705562	0.0739967	0.0655666	0.0703355	0.0347579	0.0684785	0.0712741	0.0500941	0.0934155	0.105079	0.0547583	0.0831427	0.0893615	0.0868869	0.0740204	0.0418879	0.0513567	0.0577533	0.0717545	0.0779586	0.0715567	0.0494211	0.0770232	0.0570871	0.0793461	0.0501312	0.081899
Fe3+	0.656969	0.748304	0.657324	0.613575	0.73557	0.386257	0.463907	0.587926	0.654673	0.693661	0.535033	0.704674	0.551308	0.639066	0.44517	0.608395	0.462829	0.55777	0.665952	0.464944	0.629959	0.624451	0.694421	0.603857	0.568751	0.575703	0.606443	0.597429	0.677074	0.616143	0.38041	0.614619	0.653478	0.67226	0.68721	0.599715	0.640451	0.62177	0.648772	0.520335	0.525439	0.618243	0.627736	0.477604	0.599045	0.560569	0.619351	0.665627
Mg	2.74269	2.66739	2.59808	2.81121	2.74275	2.49588	3.02372	2.82127	2.71386	2.75463	2.66534	2.75316	2.66044	2.86683	2.95841	2.85522	2.66166	2.75132	2.83991	2.89788	2.92065	2.82725	2.79155	2.63334	2.61943	2.94847	2.77823	2.43132	2.7955	2.75485	2.5108	2.92208	2.58933	2.6571	2.64698	2.56598	2.85455	2.91072	2.79005	2.73362	2.77441	2.74373	2.90334	2.61517	2.88194	2.77811	2.87708	2.62271
Mn	0.0657762	0.0699052	0.0608781	0.0687065	0.0677607	0.0697282	0.060611	0.0664863	0.0645745	0.0591088	0.0582472	0.0643788	0.059238	0.0612792	0.0664727	0.056114	0.0709546	0.0632148	0.061045	0.0620266	0.0611547	0.0658309	0.0692587	0.0599663	0.0679085	0.068481	0.0675261	0.0664971	0.0626901	0.0665246	0.0731996	0.0669317	0.0683933	0.0671647	0.0659242	0.0606262	0.061806	0.0701445	0.0663174	0.0626184	0.0687468	0.0653878	0.066196	0.0619527	0.0629991	0.0621361	0.0616905	0.0646873
Fe2+	1.31374	1.31484	1.44261	1.29874	1.25553	1.65698	1.34783	1.30393	1.33628	1.2992	1.43064	1.2893	1.39395	1.23411	1.27785	1.24803	1.54648	1.42711	1.25094	1.35477	1.23305	1.33672	1.28664	1.48388	1.48081	1.28099	1.3623	1.53043	1.29038	1.35941	1.71869	1.29735	1.42307	1.4084	1.39421	1.49707	1.27397	1.27088	1.31199	1.44958	1.45921	1.36545	1.2571	1.48121	1.27708	1.38619	1.29676	1.42565
Ca	0.011643	0.00274334	0.0281872	0.0162688	0.0219457	0.0102611	0	0.0119152	0.00458754	0.0124937	0.0252881	0.00649982	0	0.0377493	0.0487517	0.0342879	0.0236541	0.0189381	0.0305395	0.0128605	0.00135098	0.000223183	0.00199092	0.0233748	0.00800118	0	0.0204769	0	0.00765331	0	0.0168251	0	0.0126955	0.00854995	0.0028391	0.00728663	0.0119783	0.00999091	0.0172171	0.0127223	0.0281629	0.0141519	0.0157542	0	0.0152189	0.00938429	0.0196139	0.00524101
	5	5	5	5	5	5	5	5	5	5	5	5	5	5	5	5	5	5	5	5	5	5	5	5	5	5	5	5	5	5	5	5	5	5	5	5	5	5	5	5	5	5	5	5	5	5	5	5
M4 site
Fe	0	0	0	0	0	0	0.00426519	0	0	0	0	0	0.0116878	0	0	0	0	0	0	0	0	0	0	0	0	0.00481454	0	0.010526	0	0.00392996	0	0.00323972	0	0	0	0	0	0	0	0	0	0	0	0.0381703	0	0	0	0
Ca	1.89865	1.88859	1.91742	1.90389	1.91032	1.89708	1.96777	1.89896	1.89067	1.89961	1.91412	1.89283	1.86065	1.92831	1.94088	1.92436	1.91226	1.90691	1.92009	1.90003	1.90207	1.89122	1.88793	1.91195	1.89453	1.92137	1.90866	1.86312	1.91657	1.87714	1.90452	1.91468	1.89984	1.89515	1.8887	1.89372	1.90043	1.89717	1.90496	1.89987	1.91739	1.90149	1.9033	1.85706	1.91436	1.89609	1.90768	1.89141
Na	0.101352	0.111409	0.0825838	0.0961142	0.0896756	0.102916	0.0279602	0.101044	0.109327	0.10039	0.0858795	0.107168	0.127659	0.0716926	0.0591213	0.0756389	0.0877359	0.0930881	0.0799075	0.0999743	0.0979283	0.10878	0.112069	0.088053	0.105471	0.0738126	0.0913425	0.126353	0.0834257	0.118932	0.0954837	0.08208	0.100161	0.104851	0.111301	0.106279	0.0995665	0.102826	0.0950394	0.100131	0.0826114	0.0985122	0.0966972	0.104767	0.0856376	0.103907	0.0923216	0.10859
	2	2	2	2	2	2	2	2	2	2	2	2	2	2	2	2	2	2	2	2	2	2	2	2	2	2	2	2	2	2	2	2	2	2	2	2	2	2	2	2	2	2	2	2	2	2	2	2
A site
Ca	0	0	0	0	0	0	0	0	0	0	0	0	0	0	0	0	0	0	0	0	0	0	0	0	0	0	0	0	0	0	0	0	0	0	0	0	0	0	0	0	0	0	0	0	0	0	0	0
Na	0.117754	0.118632	0.151552	0.103794	0.114977	0.149874	0.185249	0.175487	0.191932	0.16881	0.175687	0.156526	0.160595	0.159741	0.0961377	0.130157	0.152201	0.1168	0.144404	0.132719	0.0992238	0.110381	0.113769	0.162171	0.130251	0.0745462	0.148945	0.129723	0.0843641	0.149021	0.192291	0.0981016	0.118	0.156768	0.126274	0.14725	0.100906	0.104255	0.118725	0.174645	0.149567	0.126992	0.101582	0.106251	0.0866267	0.166812	0.102513	0.171448
K	0.108285	0.123311	0.0981682	0.0973935	0.0927541	0.15765	0.0711933	0.116675	0.143293	0.129216	0.139562	0.134353	0.138991	0.109118	0.0809541	0.111695	0.151303	0.13701	0.10206	0.0901958	0.0733756	0.0822311	0.0907428	0.092181	0.102216	0.0630624	0.100778	0.121931	0.0716664	0.11305	0.129574	0.0648136	0.1173	0.114484	0.119077	0.124242	0.0775147	0.070179	0.0975568	0.0964876	0.0825274	0.103216	0.0766759	0.11289	0.0802301	0.105084	0.0735373	0.139484
Sum A	0.226039	0.241944	0.24972	0.201188	0.207731	0.307525	0.256442	0.292162	0.335226	0.298026	0.315249	0.29088	0.299586	0.268859	0.177092	0.241852	0.303504	0.253809	0.246464	0.222915	0.172599	0.192612	0.204511	0.254352	0.232467	0.137609	0.249722	0.251654	0.156031	0.262071	0.321865	0.162915	0.2353	0.271252	0.245352	0.271492	0.178421	0.174434	0.216282	0.271133	0.232094	0.230208	0.178258	0.219141	0.166857	0.271895	0.17605	0.310932
OH site
O	0	0	0	0	0	0	0	0	0	0	0	0	0	0	0	0	0	0	0	0	0	0	0	0	0	0	0	0	0	0	0	0	0	0	0	0	0	0	0	0	0	0	0	0	0	0	0	0
OH	2	2	2	2	2	2	2	2	2	2	2	2	2	2	2	2	2	2	2	1.99901	2	2	1.999	2	1.999	2	2	2	2	1.99901	2	2	2	1.999	2	2	2	1.99901	2	2	2	2	1.999	2	2	2	2	1.999
F	0	0	0	0	0	0	0	0	0	0	0	0	0	0	0	0	0	0	0	0	0	0	0	0	0	0	0	0	0	0	0	0	0	0	0	0	0	0	0	0	0	0	0	0	0	0	0	0
Cl	0	0	0	0	0	0	0	0	0	0	0	0	0	0	0	0	0	0	0	0.000994967	0	0	0.000999588	0	0.00100414	0	0	0	0	0.000990128	0	0	0	0.00100458	0	0	0	0.000993113	0	0	0	0	0.000998312	0	0	0	0	0.00100246
	2	2	2	2	2	2	2	2	2	2	2	2	2	2	2	2	2	2	2	2	2	2	2	2	2	2	2	2	2	2	2	2	2	2	2	2	2	2	2	2	2	2	2	2	2	2	2	2
Sum cations	15.226	15.2419	15.2497	15.2012	15.2077	15.3075	15.2564	15.2922	15.3352	15.298	15.3152	15.2909	15.2996	15.2689	15.1771	15.2419	15.3035	15.2538	15.2465	15.2229	15.1726	15.1926	15.2045	15.2544	15.2325	15.1376	15.2497	15.2517	15.156	15.2621	15.3219	15.1629	15.2353	15.2713	15.2454	15.2715	15.1784	15.1744	15.2163	15.2711	15.2321	15.2302	15.1783	15.2191	15.1669	15.2719	15.1761	15.3109
Cation CHG	46	46	46	46	46	46	46	46	46	46	46	46	46	46	46	46	46	46	46	46	46	46	46	46	46	46	46	46	46	46	46	46	46	46	46	46	46	46	46	46	46	46	46	46	46	46	46	46
Fe#	0.418108	0.436133	0.446984	0.404849	0.420609	0.450139	0.375228	0.401401	0.423173	0.419772	0.424459	0.420038	0.423822	0.395184	0.368055	0.394007	0.430169	0.419088	0.40298	0.385729	0.389453	0.409565	0.41509	0.442215	0.438973	0.387009	0.414737	0.467949	0.413074	0.418113	0.455346	0.395926	0.44505	0.439164	0.440196	0.449687	0.401432	0.394025	0.412722	0.418816	0.417026	0.419614	0.393644	0.432983	0.394304	0.412024	0.399757	0.443632
Mg/Fe2+	2.08769	2.02868	1.80095	2.16457	2.18454	1.50629	2.23633	2.16367	2.03091	2.12025	1.86304	2.13539	1.89269	2.323	2.31514	2.28779	1.72111	1.92789	2.27022	2.13903	2.36864	2.11507	2.16964	1.77464	1.76892	2.2931	2.03936	1.5778	2.16642	2.02066	1.46088	2.24673	1.81954	1.88662	1.89855	1.714	2.24068	2.29032	2.12658	1.8858	1.90131	2.0094	2.30955	1.72121	2.25667	2.00413	2.21866	1.83967
Mg/Fe	1.39173	1.29288	1.23722	1.47006	1.37751	1.22154	1.66505	1.49127	1.3631	1.38225	1.35594	1.38074	1.35948	1.53047	1.71699	1.53802	1.32467	1.38613	1.48152	1.5925	1.5677	1.44161	1.40912	1.26134	1.27805	1.58392	1.41117	1.13699	1.42087	1.3917	1.19613	1.52572	1.24694	1.27705	1.27172	1.22377	1.49108	1.53791	1.42294	1.38769	1.39793	1.38314	1.54037	1.30956	1.53611	1.42704	1.50152	1.25412
XMg	0.548538	0.533479	0.519615	0.562242	0.54855	0.499177	0.604745	0.564254	0.542772	0.550926	0.533068	0.550632	0.532087	0.573367	0.591681	0.571045	0.532332	0.550263	0.567982	0.579577	0.584129	0.56545	0.558309	0.526669	0.523887	0.589695	0.555645	0.486264	0.559099	0.550969	0.50216	0.584416	0.517866	0.531421	0.529395	0.513196	0.570911	0.582143	0.558009	0.546724	0.554882	0.548747	0.580669	0.523035	0.576387	0.555622	0.575416	0.524542
XOH	1	1	1	1	1	1	1	1	1	1	1	1	1	1	1	1	1	1	1	0.999503	1	1	0.9995	1	0.999498	1	1	1	1	0.999505	1	1	1	0.999498	1	1	1	0.999503	1	1	1	1	0.999501	1	1	1	1	0.999499
cm	-0.011643	-0.00274334	-0.0281872	-0.0162688	-0.0219457	-0.0102611	0.00426519	-0.0119152	-0.00458754	-0.0124937	-0.0252881	-0.00649982	0.0116878	-0.0377493	-0.0487517	-0.0342879	-0.0236541	-0.0189381	-0.0305395	-0.0128605	-0.00135098	-0.000223183	-0.00199092	-0.0233748	-0.00800118	0.00481454	-0.0204769	0.010526	-0.00765331	0.00392996	-0.0168251	0.00323972	-0.0126955	-0.00854995	-0.0028391	-0.00728663	-0.0119783	-0.00999091	-0.0172171	-0.0127223	-0.0281629	-0.0141519	-0.0157542	0.0381703	-0.0152189	-0.00938429	-0.0196139	-0.00524101
XSi,T1	0.731237	0.705405	0.723527	0.752263	0.726681	0.721159	0.77868	0.726639	0.693994	0.705773	0.70783	0.70396	0.706646	0.723504	0.789215	0.734443	0.744208	0.748456	0.730263	0.780913	0.768745	0.768908	0.745749	0.742174	0.744706	0.799847	0.750418	0.707919	0.75838	0.736057	0.747015	0.787692	0.718803	0.721363	0.722253	0.722932	0.770391	0.784691	0.751644	0.753945	0.775772	0.746368	0.777854	0.741735	0.774731	0.747122	0.780322	0.708511
XAl,T1	0.268763	0.294595	0.276473	0.247737	0.273319	0.278841	0.22132	0.273361	0.306006	0.294227	0.29217	0.29604	0.293354	0.276496	0.210785	0.265557	0.255792	0.251544	0.269737	0.219087	0.231255	0.231092	0.254251	0.257826	0.255294	0.200153	0.249582	0.292081	0.24162	0.263943	0.252985	0.212308	0.281197	0.278637	0.277747	0.277068	0.229609	0.215309	0.248356	0.246055	0.224228	0.253632	0.222146	0.258265	0.225269	0.252878	0.219678	0.291489
XAl,M2	0.0624817	0.0470408	0.0722036	0.0553554	0.0566174	0.118641	0.00748396	0.0512729	0.0542992	0.0380961	0.0833096	0.034103	0.109975	0.0260885	0.0633486	0.0541402	0.0621398	0.0378064	0.0283935	0.0632848	0.0436438	0.0374866	0.0410734	0.0650074	0.0923782	0.0457978	0.0482743	0.151524	0.0583069	0.0548296	0.0974948	0.0221302	0.0849435	0.0485825	0.0579765	0.0976513	0.057678	0.032572	0.053952	0.074687	0.0330362	0.0607368	0.0402229	0.143517	0.0533182	0.062132	0.0376849	0.0670939
Xvac,A	0.773961	0.758056	0.75028	0.798812	0.792269	0.692475	0.743558	0.707838	0.664774	0.701974	0.684751	0.70912	0.700414	0.731141	0.822908	0.758148	0.696496	0.746191	0.753536	0.777085	0.827401	0.807388	0.795489	0.745648	0.767533	0.862391	0.750278	0.748346	0.843969	0.737929	0.678135	0.837085	0.7647	0.728748	0.754648	0.728508	0.821579	0.825566	0.783718	0.728867	0.767906	0.769792	0.821742	0.780859	0.833143	0.728105	0.82395	0.689068
XNa,A	0.117754	0.118632	0.151552	0.103794	0.114977	0.149874	0.185249	0.175487	0.191932	0.16881	0.175687	0.156526	0.160595	0.159741	0.0961377	0.130157	0.152201	0.1168	0.144404	0.132719	0.0992238	0.110381	0.113769	0.162171	0.130251	0.0745462	0.148945	0.129723	0.0843641	0.149021	0.192291	0.0981016	0.118	0.156768	0.126274	0.14725	0.100906	0.104255	0.118725	0.174645	0.149567	0.126992	0.101582	0.106251	0.0866267	0.166812	0.102513	0.171448
XNa,M4	0.0506761	0.0557046	0.0412919	0.0480571	0.0448378	0.0514578	0.0139801	0.0505222	0.0546637	0.0501948	0.0429398	0.0535838	0.0638295	0.0358463	0.0295607	0.0378194	0.0438679	0.0465441	0.0399537	0.0499871	0.0489641	0.0543899	0.0560344	0.0440265	0.0527355	0.0369063	0.0456713	0.0631767	0.0417129	0.0594662	0.0477419	0.04104	0.0500805	0.0524253	0.0556506	0.0531393	0.0497832	0.0514128	0.0475197	0.0500654	0.0413057	0.0492561	0.0483486	0.0523834	0.0428188	0.0519537	0.0461608	0.0542948
XCa,M4	0.955145	0.945667	0.972802	0.960077	0.966135	0.953673	0.983887	0.955435	0.94763	0.956052	0.969704	0.949666	0.930327	0.983028	0.994815	0.979324	0.967959	0.962925	0.975316	0.956443	0.951711	0.945722	0.944961	0.967661	0.951265	0.960686	0.964567	0.93156	0.962114	0.938569	0.960671	0.95734	0.956267	0.95185	0.945769	0.950504	0.956206	0.953583	0.961089	0.956296	0.972776	0.95782	0.959528	0.928531	0.964791	0.952738	0.963646	0.948326
XK,A	0.108285	0.123311	0.0981682	0.0973935	0.0927541	0.15765	0.0711933	0.116675	0.143293	0.129216	0.139562	0.134353	0.138991	0.109118	0.0809541	0.111695	0.151303	0.13701	0.10206	0.0901958	0.0733756	0.0822311	0.0907428	0.092181	0.102216	0.0630624	0.100778	0.121931	0.0716664	0.11305	0.129574	0.0648136	0.1173	0.114484	0.119077	0.124242	0.0775147	0.070179	0.0975568	0.0964876	0.0825274	0.103216	0.0766759	0.11289	0.0802301	0.105084	0.0735373	0.139484
Ked-tr	1.34679	1.15233	0.975729	1.76001	1.37976	0.899945	1.01717	0.772263	0.565778	0.718452	0.680113	0.775936	0.756705	0.928475	2.48454	1.24888	0.897053	1.28077	1.07873	1.59357	2.11659	1.85834	1.56599	1.01062	1.31253	3.52998	1.15647	1.06761	2.39756	1.05442	0.795134	2.4173	1.2712	0.923501	1.19254	0.99059	2.09632	2.2146	1.53305	0.981302	1.36308	1.36883	2.1736	1.61967	2.53818	0.989579	2.19086	0.749647
Thermometry based on arbitrary pressure (user may input arbitary pressures in Kb))
P kb (var input)	2	2	2	2	2	2	2	2	2	2	2	2	2	2	2	2	2	2	2	2	2	2	2	2	2	2	2	2	2	2	2	2	2	2	2	2	2	2	2	2	2	2	2	2	2	2	2	2
T (C) HB1 '94	706.068	727.976	724.15	689.853	713.01	688.989	743.239	745.299	766.575	762.397	735.768	759.994	715.982	747.307	657.11	711.264	721.666	716.279	738.279	683.084	685.07	693.889	707.333	719.256	688.01	646.008	716.445	674.538	672.713	720.235	700.141	684.324	697.952	735.48	714.7	701.833	676.867	683.788	698.075	708.602	710.173	701.33	681.481	647.428	665.138	716.243	682.342	734.672
T (C) HB2 '94	678.139	703.54	664.596	669.852	674.733	652.768	626.689	703.366	720.994	717.902	680.241	724.517	690.653	673.679	611.518	654.683	693.771	707.983	679.853	655.822	667.671	679.155	687.181	662.443	654.464	636.224	670.557	645.227	650.736	689.769	649.719	662.926	663.212	690.093	685.518	660.721	658.646	671.452	665.831	661.345	663.281	666.871	664.621	623.602	648.768	672.985	662.283	687.794
T (C) BH '90	710.419	732.474	717.03	692.217	714.329	719.055	675.798	722.017	750.246	740.094	738.318	741.658	739.34	712.121	654.928	702.826	717.957	714.124	708.931	664.708	675.543	675.399	695.626	698.711	696.526	647.474	691.583	727.923	684.652	703.97	694.531	658.595	717.844	715.672	714.915	714.338	673.31	660.553	689.715	687.718	668.537	694.279	666.682	698.27	669.463	693.628	664.476	726.555
P kb (var input)	8	8	8	8	8	8	8	8	8	8	8	8	8	8	8	8	8	8	8	8	8	8	8	8	8	8	8	8	8	8	8	8	8	8	8	8	8	8	8	8	8	8	8	8	8	8	8	8
T (C) HB1 '94	651.876	668.678	670.32	635.619	657.478	647.152	672.466	684.028	703.546	696.865	682.44	694.028	670.785	680.712	606.928	654.4	664.526	655.37	673.557	630.196	629.152	635.587	648.729	663.75	641.354	593.736	657.496	642.307	621.115	662.331	651.809	624.104	649.186	674.9	658.509	654.903	624.307	625.484	642.577	655.475	648.506	646.8	624.907	614.803	612.688	659.82	625.204	677.542
T (C) HB2 '94	688.75	711.514	676.605	679.293	684.228	672.863	627.873	712.163	730.256	724.379	694.225	730.346	709.772	677.928	621.96	663.578	704.547	714.587	684.551	666.739	675.148	685.636	694.227	673.342	670.217	644.001	678.705	671.1	660.542	699.187	666.215	666.695	677.466	698.286	695.351	677.221	668.534	677.09	674.965	674.061	668.866	677.164	671.522	648.056	657.81	683.567	668.73	699.088
T (C) BH '90	626.531	646.705	632.578	609.881	630.107	634.43	594.863	637.139	662.961	653.675	652.05	655.105	652.985	628.088	575.773	619.585	633.426	629.919	625.17	584.719	594.63	594.498	612.999	615.821	613.823	568.954	609.302	642.542	602.961	620.632	611.998	579.127	633.323	631.335	630.644	630.116	592.587	580.918	607.593	605.766	588.221	611.767	586.524	615.418	589.068	611.172	584.506	641.29
Results based on Schmidt pressure (used for purposes of calculation)
Pschmidt (kb)	2.70208	3.04691	2.94143	2.23389	2.73299	3.4286	1.27517	2.68291	3.33329	2.95477	3.34603	2.95126	3.62242	2.50285	1.60643	2.56162	2.45186	2.13931	2.3961	1.76388	1.80859	1.74687	2.22196	2.51788	2.73023	1.2369	2.20161	3.99374	2.14553	2.53745	2.73498	1.24302	3.15266	2.75776	2.83024	3.19501	1.91085	1.39957	2.23233	2.38591	1.5738	2.39736	1.60259	3.27364	1.7867	2.3963	1.53143	3.17868
T (C) HB1 '94	699.727	717.629	715.704	687.739	706.226	679.028	751.789	738.325	752.569	751.969	723.805	749.535	703.76	741.726	660.401	705.941	717.363	714.865	734.006	685.165	686.853	696.348	705.165	714.465	682.332	652.656	714.464	663.828	671.461	715.048	694.22	691.922	688.584	727.829	706.925	692.486	677.648	689.623	695.926	705.185	714.553	697.719	685.229	640.503	667.003	712.517	686.804	723.449
T (C) HB2 '94	679.38	704.931	666.48	670.22	675.893	657.553	626.546	704.368	723.052	718.933	683.378	725.441	695.823	674.035	610.833	655.515	694.583	708.137	680.163	655.392	667.433	678.881	687.442	663.384	656.381	635.235	670.831	653.824	650.974	690.613	651.739	662.451	665.95	691.127	686.878	664.008	658.499	670.888	666.184	662.163	662.884	667.553	664.164	628.793	648.447	673.684	661.779	690.013
T (C) BH '90	700.603	717.509	703.779	689.007	704.04	698.906	685.576	712.356	730.85	726.342	718.965	727.935	715.989	705.078	660.12	695.034	711.591	712.168	703.401	667.856	678.125	678.812	692.569	691.556	686.461	657.46	688.819	699.552	682.67	696.505	684.421	668.621	701.607	705.021	703.254	697.564	674.51	668.522	686.536	682.447	674.242	688.814	671.992	680.683	672.321	688.182	670.721	709.805
Results based on iteration using Anderson and Smith pressure at various thermometers (note: jla prefers HB2 results)
T (C) HB1*	701.957	722.782	719.981	688.695	709.292	679.288	763.378	747.126	765.912	765.201	729.479	762.235	706.265	751.995	659.751	708.973	721.858	719.116	742.168	685.826	687.694	698.067	708.04	718.465	682.819	651.824	718.545	663.297	671.251	719.34	695.689	693.142	689.654	734.61	710.166	693.858	677.811	690.65	697.661	707.835	718.442	699.649	685.921	639.337	666.579	716.262	687.613	729.404
P(Kb) HB1*	2.45511	2.52561	2.46475	2.12814	2.40178	3.39129	0.292617	1.82105	2.06312	1.74324	2.70758	1.79609	3.2899	1.5776	1.68416	2.24179	1.97985	1.72052	1.63946	1.68888	1.71843	1.56999	1.92752	2.08547	2.66763	1.33238	1.78623	4.09258	2.16998	2.0928	2.55263	1.12145	3.02099	2.08607	2.48418	3.01959	1.89224	1.29392	2.04473	2.08667	1.19541	2.18492	1.52917	3.48797	1.8352	1.99805	1.44648	2.55329
T (C) HB2	679.321	704.547	666.602	670.269	675.882	657.973	626.571	703.974	722.232	718.439	683.209	724.912	695.183	674.04	611.063	655.69	694.293	707.819	680.133	655.571	667.487	678.854	687.332	663.52	656.688	635.394	670.868	654.522	651.179	690.414	652.123	662.488	666.109	690.941	686.717	664.228	658.646	670.909	666.268	662.332	662.943	667.637	664.23	629.791	648.631	673.7	661.852	689.762
P(Kb) HB2	2.66858	2.7581	3.0025	2.26499	2.72631	3.55415	1.40094	2.41456	2.80188	2.49783	3.27349	2.40634	3.4217	2.50972	1.73846	2.67933	2.29064	1.85085	2.35811	1.86187	1.8525	1.72193	2.12797	2.5928	2.84704	1.35954	2.22876	4.1555	2.27107	2.41065	2.87455	1.30298	3.21951	2.62149	2.73204	3.27534	1.99962	1.42216	2.28754	2.46546	1.63714	2.44614	1.66043	3.51847	1.90908	2.4054	1.59888	3.04543
T (C) BH	704.437	725.508	708.426	690.698	708.57	702.91	686.563	718.637	743.341	736.7	727.776	738.772	724.341	709.626	659.057	697.79	717.451	717.825	707.539	667.261	678.426	679.178	694.77	693.732	687.947	656.387	690.472	704.102	683.514	699.496	685.617	668.155	705.97	709.772	707.704	701.144	674.463	668.028	687.889	683.308	674.177	690.534	671.737	681.452	672.082	689.811	670.372	716.019
P(Kb) BH	2.42784	2.48728	2.61125	2.11071	2.41026	3.14469	1.20193	2.2389	2.47454	2.23557	2.73314	2.19998	3.04212	2.17812	1.68701	2.36293	2.0359	1.73622	2.09973	1.80855	1.78623	1.71975	2.06212	2.36039	2.62244	1.31887	2.08108	3.674	2.08352	2.32207	2.64807	1.27824	2.84291	2.41975	2.51343	2.93994	1.9143	1.43682	2.13347	2.32289	1.5787	2.2723	1.62164	3.21794	1.80451	2.27774	1.55762	2.74135
*	HB 1 refers to Holland and Blundy Hbld-Plag thermometry calibration reaction edenite + 4 quartz = tremolite + albite
	HB 2 refers to Holland and Blundy Hbld-Plag thermometry calibration reaction edenite + albite = richterite + anorthite
	BH refers to Blundy and Holland Hbld-Plag thermometry calibration reaction edenite + 4 quartz = tremolite + albite
Temperature based on Ti (Otten, 1984) - warning: semi empirical; best used to determine magmatic versus secondary compositions
T (C) Ti-hbld	646.397	668.686	627.489	642.275	621.103	717.905	652.109	672.537	686.383	671.071	688.071	681.995	683.599	675.98	637.288	652.962	677.617	672.667	659.171	642.46	625.128	629.95	634.092	623.942	629.684	586.849	627.448	630.814	605.313	657.472	671.515	610.929	645.104	652.591	649.612	634.121	595.433	606.833	614.535	631.392	638.862	631.154	604.503	637.736	613.733	640.533	605.358	643.606
Iterations for Anderson and Smith/Holland and Blundy
Iteration 1 (using T at Schmidt P)
Pas HB1	2.47898	2.5955	2.52091	2.13628	2.43735	3.39362	0.476887	1.96093	2.31399	1.98439	2.79133	2.02321	3.32103	1.74368	1.68144	2.27617	2.03699	1.77143	1.76139	1.69388	1.72502	1.58546	1.95856	2.1351	2.67175	1.33011	1.83519	4.08846	2.16865	2.14654	2.56733	1.13091	3.03151	2.1848	2.52252	3.03384	1.89335	1.30179	2.06136	2.1158	1.23887	2.20429	1.53427	3.48347	1.83297	2.04295	1.45253	2.63971
Pas HB2	2.6681	2.75364	3.00333	2.2653	2.72623	3.55679	1.40093	2.41019	2.7902	2.49129	3.2719	2.3989	3.41451	2.50976	1.73802	2.68018	2.28787	1.84741	2.35788	1.86255	1.85279	1.72174	2.12705	2.59359	2.84864	1.35963	2.22899	4.16009	2.27184	2.40882	2.87633	1.30313	3.22061	2.61971	2.73058	3.27684	2.00026	1.42227	2.28802	2.46638	1.63741	2.44665	1.66075	3.521	1.90963	2.40551	1.59919	3.04293
Pas BH	2.46968	2.59709	2.66549	2.12545	2.46201	3.19138	1.20884	2.31742	2.67494	2.38943	2.85959	2.36337	3.16166	2.22929	1.68262	2.3904	2.10667	1.80256	2.14473	1.80538	1.78826	1.72221	2.08232	2.38092	2.63587	1.31532	2.09538	3.73095	2.09007	2.35238	2.65855	1.27602	2.89378	2.47481	2.56436	2.9799	1.914	1.43437	2.14482	2.32982	1.57832	2.28762	1.6202	3.22485	1.80309	2.29212	1.55574	2.82108
Iteration 2 (using prior P for new T and P)
T (C) HB1	701.742	722.091	719.477	688.621	708.963	679.272	761.205	745.698	763.277	762.568	728.735	759.739	706.031	750.152	659.774	708.647	721.314	718.6	740.852	685.782	687.632	697.917	707.737	718.006	682.786	651.844	718.064	663.319	671.262	718.821	695.571	693.047	689.569	733.614	709.807	693.746	677.802	690.573	697.507	707.577	717.996	699.473	685.873	639.362	666.598	715.839	687.555	728.581
P(Kb) HB1	2.45744	2.53517	2.47148	2.12877	2.40565	3.39143	0.328443	1.8444	2.11441	1.79297	2.7188	1.84232	3.29285	1.60837	1.68407	2.24554	1.9869	1.72683	1.65967	1.68921	1.71892	1.57136	1.93084	2.09127	2.66791	1.33232	1.79211	4.09241	2.16991	2.09941	2.55382	1.12219	3.02183	2.10094	2.4885	3.02075	1.89231	1.29451	2.04622	2.08955	1.2005	2.1867	1.52953	3.48788	1.8351	2.0032	1.44692	2.5655
T (C) HB2	679.32	704.541	666.604	670.27	675.882	657.982	626.571	703.968	722.214	718.432	683.205	724.905	695.16	674.04	611.062	655.691	694.288	707.815	680.133	655.572	667.488	678.854	687.331	663.521	656.692	635.394	670.868	654.542	651.18	690.411	652.128	662.489	666.112	690.939	686.715	664.233	658.647	670.909	666.269	662.334	662.943	667.637	664.23	629.801	648.632	673.7	661.852	689.758
P(Kb) HB2	2.66859	2.75817	3.00249	2.26499	2.72631	3.55409	1.40094	2.41463	2.80214	2.49792	3.27352	2.40645	3.42195	2.50972	1.73846	2.67932	2.29069	1.85089	2.35811	1.86187	1.85249	1.72193	2.12798	2.59279	2.84702	1.35954	2.22876	4.15537	2.27106	2.41067	2.87452	1.30298	3.21949	2.62151	2.73206	3.27531	1.99961	1.42216	2.28753	2.46545	1.63714	2.44613	1.66043	3.51844	1.90908	2.4054	1.59888	3.04548
T (C) BH	703.852	723.939	707.663	690.495	707.844	702.251	686.47	717.526	740.427	734.485	725.959	736.416	722.621	708.91	659.115	697.409	716.454	716.894	706.911	667.303	678.399	679.145	694.492	693.448	687.761	656.434	690.275	703.291	683.425	699.075	685.472	668.184	705.254	708.998	706.989	700.583	674.467	668.06	687.733	683.213	674.182	690.323	671.756	681.356	672.101	689.614	670.397	714.887
P(Kb) BH	2.43434	2.50945	2.62034	2.11249	2.41873	3.1525	1.20259	2.25314	2.52302	2.2696	2.76001	2.23675	3.06745	2.18635	1.68677	2.36679	2.04824	1.74741	2.1067	1.80833	1.78642	1.71997	2.06471	2.3631	2.62413	1.31872	2.0828	3.68433	2.08421	2.32641	2.64934	1.2781	2.85143	2.42891	2.52178	2.9463	1.91427	1.43666	2.13479	2.32365	1.57867	2.2742	1.62153	3.2188	1.80439	2.27951	1.55749	2.75624
Iteration 3
T (C) HB1	701.936	722.687	719.92	688.689	709.256	679.287	762.956	746.887	765.373	764.659	729.38	761.727	706.243	751.654	659.752	708.937	721.791	719.052	741.95	685.823	687.689	698.054	708.008	718.412	682.816	651.825	718.488	663.298	671.251	719.276	695.679	693.135	689.647	734.46	710.125	693.849	677.811	690.644	697.647	707.81	718.39	699.633	685.917	639.338	666.58	716.213	687.609	729.288
P(Kb) HB1	2.45534	2.52692	2.46556	2.12819	2.4022	3.3913	0.299622	1.82496	2.07367	1.75356	2.70909	1.80555	3.29018	1.58333	1.68416	2.2422	1.98072	1.7213	1.64282	1.6889	1.71847	1.57011	1.92788	2.08615	2.66765	1.33238	1.78694	4.09257	2.16997	2.09362	2.55272	1.12151	3.02106	2.08831	2.48467	3.01968	1.89224	1.29396	2.04486	2.08696	1.19601	2.18508	1.5292	3.48797	1.8352	1.99864	1.44652	2.55502
T (C) HB2	679.321	704.547	666.602	670.269	675.882	657.973	626.571	703.974	722.232	718.439	683.209	724.912	695.184	674.04	611.063	655.69	694.293	707.819	680.133	655.571	667.487	678.854	687.332	663.52	656.688	635.394	670.868	654.521	651.179	690.414	652.123	662.488	666.109	690.941	686.717	664.228	658.646	670.909	666.268	662.332	662.943	667.637	664.23	629.791	648.631	673.7	661.852	689.762
P(Kb) HB2	2.66858	2.7581	3.0025	2.26499	2.72631	3.55415	1.40094	2.41456	2.80188	2.49783	3.27349	2.40634	3.42169	2.50972	1.73846	2.67933	2.29064	1.85085	2.35811	1.86187	1.8525	1.72193	2.12797	2.5928	2.84704	1.35954	2.22876	4.1555	2.27107	2.41065	2.87455	1.30298	3.21951	2.62149	2.73204	3.27534	1.99962	1.42216	2.28754	2.46546	1.63714	2.44614	1.66043	3.51847	1.90908	2.4054	1.59888	3.04543
T (C) BH	704.346	725.192	708.298	690.673	708.451	702.8	686.555	718.436	742.637	736.211	727.39	738.242	723.977	709.511	659.061	697.737	717.277	717.668	707.441	667.264	678.424	679.175	694.735	693.694	687.923	656.389	690.448	703.955	683.505	699.436	685.599	668.157	705.85	709.643	707.587	701.055	674.464	668.03	687.871	683.298	674.177	690.508	671.739	681.44	672.084	689.787	670.374	715.808
P(Kb) BH	2.42886	2.49178	2.61278	2.11093	2.41165	3.146	1.202	2.24149	2.48634	2.24314	2.73888	2.2083	3.04751	2.17945	1.68699	2.36348	2.03806	1.73811	2.10081	1.80853	1.78625	1.71977	2.06245	2.36074	2.62265	1.31886	2.08129	3.67588	2.08359	2.32269	2.64822	1.27823	2.84434	2.42127	2.5148	2.94095	1.91429	1.43681	2.13363	2.32297	1.5787	2.27253	1.62163	3.21805	1.8045	2.27796	1.55761	2.74414
Iteration 4
T (C) HB1	701.955	722.769	719.973	688.694	709.288	679.288	763.296	747.086	765.802	765.089	729.466	762.132	706.263	751.932	659.751	708.969	721.85	719.108	742.131	685.826	687.693	698.066	708.037	718.459	682.818	651.824	718.539	663.297	671.251	719.332	695.688	693.142	689.654	734.588	710.161	693.857	677.811	690.649	697.66	707.832	718.436	699.648	685.921	639.337	666.579	716.256	687.613	729.388
P(Kb) HB1	2.45513	2.52579	2.46484	2.12814	2.40182	3.39129	0.293981	1.8217	2.06528	1.74537	2.70778	1.79801	3.28993	1.57866	1.68416	2.24183	1.97996	1.72061	1.64002	1.68888	1.71844	1.57	1.92756	2.08555	2.66763	1.33238	1.78632	4.09258	2.16998	2.0929	2.55263	1.12145	3.02099	2.08641	2.48424	3.01959	1.89224	1.29392	2.04474	2.0867	1.19548	2.18493	1.52917	3.48797	1.8352	1.99812	1.44649	2.55354
T (C) HB2	679.321	704.547	666.602	670.269	675.882	657.973	626.571	703.974	722.232	718.439	683.209	724.912	695.183	674.04	611.063	655.69	694.293	707.819	680.133	655.571	667.487	678.854	687.332	663.52	656.688	635.394	670.868	654.522	651.179	690.414	652.123	662.488	666.109	690.941	686.717	664.228	658.646	670.909	666.268	662.332	662.943	667.637	664.23	629.791	648.631	673.7	661.852	689.762
P(Kb) HB2	2.66858	2.7581	3.0025	2.26499	2.72631	3.55415	1.40094	2.41456	2.80188	2.49783	3.27349	2.40634	3.4217	2.50972	1.73846	2.67933	2.29064	1.85085	2.35811	1.86187	1.8525	1.72193	2.12797	2.5928	2.84704	1.35954	2.22876	4.1555	2.27107	2.41065	2.87455	1.30298	3.21951	2.62149	2.73204	3.27534	1.99962	1.42216	2.28754	2.46546	1.63714	2.44614	1.66043	3.51847	1.90908	2.4054	1.59888	3.04543
T (C) BH	704.423	725.444	708.404	690.695	708.55	702.891	686.563	718.601	743.171	736.592	727.694	738.653	724.264	709.608	659.058	697.783	717.421	717.799	707.524	667.261	678.426	679.178	694.766	693.727	687.944	656.387	690.469	704.075	683.513	699.487	685.614	668.155	705.95	709.75	707.685	701.13	674.463	668.028	687.887	683.307	674.177	690.531	671.737	681.45	672.083	689.808	670.372	715.98
P(Kb) BH	2.428	2.48819	2.61151	2.11074	2.41049	3.14491	1.20194	2.23937	2.47739	2.23725	2.73436	2.20185	3.04326	2.17833	1.68701	2.36301	2.03627	1.73654	2.0999	1.80855	1.78624	1.71975	2.06216	2.36043	2.62247	1.31887	2.08111	3.67434	2.08352	2.32216	2.64808	1.27824	2.84315	2.42	2.51365	2.9401	1.9143	1.43682	2.13349	2.3229	1.5787	2.27233	1.62164	3.21796	1.80451	2.27777	1.55762	2.74187
Iteration 5
T (C) HB1	701.957	722.78	719.98	688.694	709.291	679.288	763.362	747.119	765.89	765.178	729.478	762.215	706.265	751.984	659.751	708.972	721.857	719.115	742.162	685.826	687.694	698.067	708.04	718.465	682.818	651.824	718.545	663.297	671.251	719.339	695.689	693.142	689.654	734.607	710.165	693.858	677.811	690.65	697.661	707.835	718.442	699.649	685.921	639.337	666.579	716.261	687.613	729.402
P(Kb) HB1	2.45511	2.52563	2.46476	2.12814	2.40178	3.39129	0.292876	1.82115	2.06355	1.74367	2.70761	1.79647	3.28991	1.57779	1.68416	2.24179	1.97986	1.72053	1.63955	1.68888	1.71843	1.56999	1.92753	2.08548	2.66763	1.33238	1.78624	4.09258	2.16998	2.09281	2.55263	1.12145	3.02099	2.08612	2.48419	3.01959	1.89224	1.29392	2.04473	2.08668	1.19542	2.18492	1.52917	3.48797	1.8352	1.99806	1.44648	2.55333
T (C) HB2	679.321	704.547	666.602	670.269	675.882	657.973	626.571	703.974	722.232	718.439	683.209	724.912	695.183	674.04	611.063	655.69	694.293	707.819	680.133	655.571	667.487	678.854	687.332	663.52	656.688	635.394	670.868	654.522	651.179	690.414	652.123	662.488	666.109	690.941	686.717	664.228	658.646	670.909	666.268	662.332	662.943	667.637	664.23	629.791	648.631	673.7	661.852	689.762
P(Kb) HB2	2.66858	2.7581	3.0025	2.26499	2.72631	3.55415	1.40094	2.41456	2.80188	2.49783	3.27349	2.40634	3.4217	2.50972	1.73846	2.67933	2.29064	1.85085	2.35811	1.86187	1.8525	1.72193	2.12797	2.5928	2.84704	1.35954	2.22876	4.1555	2.27107	2.41065	2.87455	1.30298	3.21951	2.62149	2.73204	3.27534	1.99962	1.42216	2.28754	2.46546	1.63714	2.44614	1.66043	3.51847	1.90908	2.4054	1.59888	3.04543
T (C) BH	704.435	725.496	708.422	690.697	708.567	702.907	686.563	718.631	743.301	736.677	727.759	738.746	724.325	709.623	659.057	697.789	717.446	717.821	707.536	667.261	678.426	679.178	694.77	693.731	687.946	656.387	690.471	704.097	683.514	699.495	685.616	668.155	705.967	709.768	707.701	701.142	674.463	668.028	687.888	683.308	674.177	690.534	671.737	681.451	672.082	689.811	670.372	716.012
P(Kb) BH	2.42787	2.48746	2.61129	2.11071	2.4103	3.14472	1.20193	2.23898	2.47521	2.23593	2.73339	2.20039	3.04235	2.17815	1.68701	2.36295	2.03596	1.73627	2.09976	1.80855	1.78623	1.71975	2.06212	2.36039	2.62245	1.31887	2.08108	3.67406	2.08352	2.32209	2.64807	1.27824	2.84295	2.41979	2.51346	2.93996	1.9143	1.43682	2.13348	2.32289	1.5787	2.2723	1.62164	3.21794	1.80451	2.27775	1.55762	2.74144
Iteration 6
T (C) HB1	701.957	722.781	719.98	688.695	709.292	679.288	763.375	747.125	765.908	765.197	729.479	762.232	706.265	751.994	659.751	708.973	721.858	719.116	742.167	685.826	687.694	698.067	708.04	718.465	682.819	651.824	718.545	663.297	671.251	719.34	695.689	693.142	689.654	734.61	710.166	693.858	677.811	690.65	697.661	707.835	718.442	699.649	685.921	639.337	666.579	716.262	687.613	729.404
P(Kb) HB1	2.45511	2.52561	2.46475	2.12814	2.40178	3.39129	0.292659	1.82106	2.06319	1.74332	2.70759	1.79615	3.2899	1.57763	1.68416	2.24179	1.97985	1.72052	1.63947	1.68888	1.71843	1.56999	1.92753	2.08547	2.66763	1.33238	1.78623	4.09258	2.16998	2.0928	2.55263	1.12145	3.02099	2.08607	2.48418	3.01959	1.89224	1.29392	2.04473	2.08667	1.19541	2.18492	1.52917	3.48797	1.8352	1.99805	1.44648	2.5533
T (C) HB2	679.321	704.547	666.602	670.269	675.882	657.973	626.571	703.974	722.232	718.439	683.209	724.912	695.183	674.04	611.063	655.69	694.293	707.819	680.133	655.571	667.487	678.854	687.332	663.52	656.688	635.394	670.868	654.522	651.179	690.414	652.123	662.488	666.109	690.941	686.717	664.228	658.646	670.909	666.268	662.332	662.943	667.637	664.23	629.791	648.631	673.7	661.852	689.762
P(Kb) HB2	2.66858	2.7581	3.0025	2.26499	2.72631	3.55415	1.40094	2.41456	2.80188	2.49783	3.27349	2.40634	3.4217	2.50972	1.73846	2.67933	2.29064	1.85085	2.35811	1.86187	1.8525	1.72193	2.12797	2.5928	2.84704	1.35954	2.22876	4.1555	2.27107	2.41065	2.87455	1.30298	3.21951	2.62149	2.73204	3.27534	1.99962	1.42216	2.28754	2.46546	1.63714	2.44614	1.66043	3.51847	1.90908	2.4054	1.59888	3.04543
T (C) BH	704.437	725.506	708.425	690.698	708.569	702.909	686.563	718.636	743.333	736.696	727.773	738.767	724.338	709.626	659.057	697.79	717.45	717.825	707.538	667.261	678.426	679.178	694.77	693.732	687.947	656.387	690.471	704.101	683.514	699.496	685.616	668.155	705.97	709.771	707.703	701.144	674.463	668.028	687.889	683.308	674.177	690.534	671.737	681.452	672.082	689.811	670.372	716.018
P(Kb) BH	2.42785	2.48731	2.61126	2.11071	2.41027	3.14469	1.20193	2.23891	2.47467	2.23564	2.73318	2.20006	3.04216	2.17813	1.68701	2.36294	2.03591	1.73622	2.09974	1.80855	1.78623	1.71975	2.06212	2.36039	2.62244	1.31887	2.08108	3.67401	2.08352	2.32207	2.64807	1.27824	2.84292	2.41975	2.51343	2.93994	1.9143	1.43682	2.13347	2.32289	1.5787	2.2723	1.62164	3.21794	1.80451	2.27774	1.55762	2.74136
Iteration 7
T (C) HB1*	701.957	722.782	719.981	688.695	709.292	679.288	763.378	747.126	765.912	765.201	729.479	762.235	706.265	751.995	659.751	708.973	721.858	719.116	742.168	685.826	687.694	698.067	708.04	718.465	682.819	651.824	718.545	663.297	671.251	719.34	695.689	693.142	689.654	734.61	710.166	693.858	677.811	690.65	697.661	707.835	718.442	699.649	685.921	639.337	666.579	716.262	687.613	729.404
P(Kb) HB1*	2.45511	2.52561	2.46475	2.12814	2.40178	3.39129	0.292617	1.82105	2.06312	1.74324	2.70758	1.79609	3.2899	1.5776	1.68416	2.24179	1.97985	1.72052	1.63946	1.68888	1.71843	1.56999	1.92752	2.08547	2.66763	1.33238	1.78623	4.09258	2.16998	2.0928	2.55263	1.12145	3.02099	2.08607	2.48418	3.01959	1.89224	1.29392	2.04473	2.08667	1.19541	2.18492	1.52917	3.48797	1.8352	1.99805	1.44648	2.55329
T (C) HB2	679.321	704.547	666.602	670.269	675.882	657.973	626.571	703.974	722.232	718.439	683.209	724.912	695.183	674.04	611.063	655.69	694.293	707.819	680.133	655.571	667.487	678.854	687.332	663.52	656.688	635.394	670.868	654.522	651.179	690.414	652.123	662.488	666.109	690.941	686.717	664.228	658.646	670.909	666.268	662.332	662.943	667.637	664.23	629.791	648.631	673.7	661.852	689.762
P(Kb) HB2	2.66858	2.7581	3.0025	2.26499	2.72631	3.55415	1.40094	2.41456	2.80188	2.49783	3.27349	2.40634	3.4217	2.50972	1.73846	2.67933	2.29064	1.85085	2.35811	1.86187	1.8525	1.72193	2.12797	2.5928	2.84704	1.35954	2.22876	4.1555	2.27107	2.41065	2.87455	1.30298	3.21951	2.62149	2.73204	3.27534	1.99962	1.42216	2.28754	2.46546	1.63714	2.44614	1.66043	3.51847	1.90908	2.4054	1.59888	3.04543
T (C) BH	704.437	725.508	708.426	690.698	708.57	702.91	686.563	718.637	743.341	736.7	727.776	738.772	724.341	709.626	659.057	697.79	717.451	717.825	707.539	667.261	678.426	679.178	694.77	693.732	687.947	656.387	690.472	704.102	683.514	699.496	685.617	668.155	705.97	709.772	707.704	701.144	674.463	668.028	687.889	683.308	674.177	690.534	671.737	681.452	672.082	689.811	670.372	716.019
P(Kb) BH	2.42784	2.48728	2.61125	2.11071	2.41026	3.14469	1.20193	2.2389	2.47454	2.23557	2.73314	2.19998	3.04212	2.17812	1.68701	2.36293	2.0359	1.73622	2.09973	1.80855	1.78623	1.71975	2.06212	2.36039	2.62244	1.31887	2.08108	3.674	2.08352	2.32207	2.64807	1.27824	2.84291	2.41975	2.51343	2.93994	1.9143	1.43682	2.13347	2.32289	1.5787	2.2723	1.62164	3.21794	1.80451	2.27774	1.55762	2.74135
Formula per 23 Oxygens (all Fe as FeO)
Atom prop	2.60427	2.59607	2.5933	2.59336	2.59424	2.55893	2.59465	2.60444	2.59842	2.59855	2.5912	2.61336	2.5794	2.59301	2.60834	2.62266	2.58738	2.60932	2.58571	2.60782	2.62495	2.60883	2.59576	2.56113	2.58398	2.61809	2.60594	2.56017	2.61915	2.62056	2.56528	2.63339	2.58892	2.58286	2.60637	2.59154	2.61738	2.61269	2.59794	2.59027	2.55957	2.58773	2.59908	2.58949	2.61079	2.61322	2.60795	2.58833
T-sites
Si	7.02528	6.93443	6.99405	7.10381	7.01896	6.94293	7.1872	6.99597	6.8738	6.92755	6.91171	6.92188	6.90939	6.99114	7.2268	7.03076	7.04774	7.07967	7.02272	7.19639	7.17321	7.17301	7.09003	7.06139	7.06619	7.29063	7.09521	6.92157	7.13859	7.0385	7.04633	7.24761	6.97429	6.98757	6.99349	6.98276	7.18155	7.23658	7.10681	7.09605	7.18516	7.08064	7.2098	7.04004	7.19259	7.0747	7.21848	6.93439
Aliv	0.974718	1.06557	1.00595	0.896192	0.981039	1.05707	0.812796	1.00403	1.1262	1.07245	1.08829	1.07812	1.09061	1.00886	0.773203	0.969239	0.952259	0.920331	0.977279	0.80361	0.826786	0.826995	0.909972	0.938607	0.933807	0.709366	0.904788	1.07843	0.861408	0.961496	0.953667	0.752394	1.02571	1.01243	1.00651	1.01724	0.818449	0.763421	0.893193	0.903952	0.814838	0.919362	0.790197	0.959964	0.807408	0.925299	0.781521	1.06561
Al(total)	1.2174	1.2935	1.26843	1.11655	1.22612	1.3641	0.909417	1.21147	1.35186	1.27229	1.35101	1.27185	1.41027	1.17448	0.979316	1.1862	1.15911	1.09507	1.15242	1.01316	1.02636	1.01309	1.116	1.17677	1.22103	0.903514	1.1095	1.49074	1.09928	1.18125	1.21699	0.905592	1.31333	1.22969	1.24555	1.32079	1.04839	0.939073	1.11708	1.14656	0.974111	1.15148	0.982437	1.33394	1.02101	1.14979	0.967102	1.31923
M1,2,3 sites
Alvi	0.242685	0.227929	0.262475	0.220359	0.245079	0.307035	0.0966218	0.207445	0.225666	0.199842	0.262724	0.193726	0.31966	0.16562	0.206113	0.216958	0.206853	0.174735	0.17514	0.209547	0.199579	0.1861	0.206026	0.23816	0.287221	0.194148	0.204716	0.412304	0.237867	0.219758	0.263326	0.153198	0.287621	0.217255	0.239039	0.303558	0.22994	0.175652	0.223892	0.242611	0.159272	0.232114	0.192241	0.373979	0.2136	0.22449	0.185582	0.253619
Ti	0.0854371	0.104428	0.0695058	0.0818858	0.0642358	0.144825	0.0898669	0.107299	0.119123	0.106313	0.120228	0.115553	0.116512	0.11032	0.0774004	0.0908714	0.111266	0.107337	0.0962196	0.081773	0.067476	0.0715272	0.0751309	0.0664388	0.071216	0.0351984	0.0693933	0.0722119	0.0508425	0.0946837	0.105955	0.0554998	0.0843409	0.0906869	0.0882046	0.0749982	0.0424793	0.0520604	0.0585795	0.0725754	0.0788594	0.0725315	0.0501048	0.0778313	0.0578404	0.0803249	0.0508154	0.0831014
Fe3+	0	0	0	0	0	0	0	0	0	0	0	0	0	0	0	0	0	0	0	0	0	0	0	0	0	0	0	0	0	0	0	0	0	0	0	0	0	0	0	0	0	0	0	0	0	0	0	0
Mg	2.78243	2.7115	2.63574	2.84921	2.78732	2.51702	3.05453	2.8578	2.75304	2.79681	2.69671	2.79599	2.69271	2.90722	2.98732	2.89349	2.68871	2.78509	2.88163	2.92747	2.9612	2.86616	2.83433	2.66837	2.65223	2.98584	2.81534	2.46331	2.83726	2.79225	2.53174	2.96165	2.62665	2.69651	2.68712	2.59987	2.89486	2.9506	2.82996	2.76489	2.80647	2.78111	2.94351	2.64261	2.91996	2.81238	2.91635	2.66122
Mn	0.0667292	0.0710612	0.0617606	0.0696353	0.0688619	0.0703187	0.0612285	0.0673471	0.0655068	0.0600138	0.0589327	0.0653804	0.0599566	0.0621425	0.0671223	0.0568661	0.0716758	0.0639907	0.0619417	0.06266	0.0620039	0.0667369	0.0703203	0.060764	0.0687587	0.0693489	0.0684282	0.0673721	0.0636266	0.0674278	0.07381	0.0678381	0.0693789	0.0681608	0.066924	0.061427	0.0626787	0.0711056	0.0672661	0.0633348	0.0695412	0.0662786	0.0671119	0.0626027	0.0638303	0.0629026	0.0625325	0.0656371
Fe2+	1.82272	1.88508	1.97052	1.77891	1.8345	1.9608	1.69775	1.76011	1.83666	1.83702	1.86141	1.82935	1.81116	1.75469	1.66205	1.74181	1.92149	1.86885	1.78507	1.71855	1.70974	1.80948	1.81419	1.96626	1.92058	1.71546	1.84212	1.9848	1.8104	1.82588	2.02517	1.76181	1.93201	1.92739	1.91871	1.96014	1.77004	1.75058	1.8203	1.85658	1.88586	1.84796	1.74703	1.84298	1.74477	1.8199	1.78472	1.93642
Ca	0	0	0	0	0	0	0	0	0	0	0	0	0	0	0	0	0	0	0	0	0	0	0	0	0	0	0	0	0	0	0	0	0	0	0	0	0	0	0	0	0	0	0	0	0	0	0	0
	5	5	5	5	5	5	5	5	5	5	5	5	5	5	5	5	5	5	5	5	5	5	5	5	5	5	5	5	5	5	5	5	5	5	5	5	5	5	5	5	5	5	5	5	5	5	5	5
M4 site
Fe	0.176544	0.212185	0.159863	0.159257	0.188954	0.0997359	0.136748	0.156235	0.183034	0.186351	0.127399	0.195644	0.169524	0.144869	0.0778103	0.139495	0.108235	0.140395	0.15998	0.119747	0.179134	0.178678	0.197236	0.14924	0.154645	0.169636	0.152925	0.181725	0.186438	0.180475	0.0914384	0.179333	0.174462	0.184127	0.194275	0.164341	0.171405	0.167998	0.168508	0.135866	0.121721	0.162756	0.163886	0.174962	0.156109	0.150876	0.157541	0.185556
Ca	1.82346	1.78781	1.84014	1.84074	1.81105	1.90026	1.86325	1.84377	1.81697	1.81365	1.8726	1.80436	1.83048	1.85513	1.92219	1.86051	1.89177	1.85961	1.84002	1.88025	1.82087	1.82132	1.80276	1.85076	1.84536	1.83036	1.84707	1.81828	1.81356	1.81953	1.90856	1.82067	1.82554	1.81587	1.80573	1.83566	1.82859	1.832	1.83149	1.86413	1.87828	1.83724	1.83611	1.82504	1.84389	1.84912	1.84246	1.81444
Na	0	0	0	0	0	0	0	0	0	0	0	0	0	0	0	0	0	0	0	0	0	0	0	0	0	0	0	0	0	0	0	0	0	0	0	0	0	0	0	0	0	0	0	0	0	0	0	0
	2	2	2	2	2	2	2	2	2	2	2	2	2	2	2	2	2	2	2	2	2	2	2	2	2	2	2	2	2	2	2	2	2	2	2	2	2	2	2	2	2	2	2	2	2	2	2	2
A site
Ca	0.114512	0.134796	0.133671	0.10537	0.152625	0.0232327	0.12457	0.0918445	0.105656	0.12773	0.0896301	0.124525	0.0527476	0.138624	0.0868838	0.124396	0.063829	0.0898833	0.139267	0.0521651	0.108986	0.0961507	0.116126	0.110305	0.0809927	0.11536	0.107832	0.0693612	0.139411	0.0830969	0.0288013	0.119942	0.114557	0.116061	0.1145	0.0904601	0.110819	0.101295	0.118183	0.0703395	0.0897527	0.104493	0.109493	0.0515086	0.111151	0.0798602	0.111137	0.110055
Na	0.222281	0.233846	0.23753	0.202611	0.207978	0.254931	0.215381	0.280111	0.305609	0.273321	0.264645	0.267796	0.291751	0.234694	0.156776	0.208554	0.242375	0.212464	0.227607	0.235069	0.19989	0.222177	0.229299	0.253553	0.238673	0.150239	0.243497	0.259446	0.170296	0.271592	0.290174	0.182622	0.221305	0.265499	0.241179	0.256878	0.203303	0.209918	0.216823	0.27792	0.234861	0.228576	0.201023	0.213232	0.174537	0.274059	0.197494	0.28415
K	0.109854	0.12535	0.0995913	0.0987101	0.0942614	0.158985	0.0719186	0.118186	0.145362	0.131194	0.141204	0.136444	0.140677	0.110656	0.0817452	0.113193	0.15284	0.138691	0.103559	0.0911168	0.0743945	0.0833627	0.0921336	0.0934072	0.103496	0.0638617	0.102124	0.123535	0.072737	0.114585	0.130655	0.0656913	0.118991	0.116182	0.120883	0.125883	0.0786092	0.0711405	0.0989524	0.0975915	0.0834809	0.104622	0.0777367	0.114074	0.0812887	0.10638	0.0745409	0.141532
Sum A	0.446647	0.493992	0.470792	0.406691	0.454864	0.437149	0.41187	0.490141	0.556628	0.532246	0.495479	0.528765	0.485176	0.483974	0.325405	0.446143	0.459045	0.441039	0.470433	0.378351	0.38327	0.40169	0.437559	0.457265	0.423161	0.329461	0.453454	0.452342	0.382445	0.469273	0.44963	0.368255	0.454852	0.497742	0.476562	0.473221	0.392731	0.382353	0.433959	0.445851	0.408094	0.437692	0.388253	0.378814	0.366977	0.460299	0.383171	0.535737
OH site
O	0	0	0	0	0	0	0	0	0	0	0	0	0	0	0	0	0	0	0	0	0	0	0	0	0	0	0	0	0	0	0	0	0	0	0	0	0	0	0	0	0	0	0	0	0	0	0	0
OH	2	2	2	2	2	2	2	2	2	2	2	2	2	2	2	2	2	2	2	1.99901	2	2	1.999	2	1.999	2	2	2	2	1.99901	2	2	2	1.999	2	2	2	1.99901	2	2	2	2	1.999	2	2	2	2	1.999
F	0	0	0	0	0	0	0	0	0	0	0	0	0	0	0	0	0	0	0	0	0	0	0	0	0	0	0	0	0	0	0	0	0	0	0	0	0	0	0	0	0	0	0	0	0	0	0	0
Cl	0	0	0	0	0	0	0	0	0	0	0	0	0	0	0	0	0	0	0	0.000994967	0	0	0.000999588	0	0.00100414	0	0	0	0	0.000990128	0	0	0	0.00100458	0	0	0	0.000993113	0	0	0	0	0.000998312	0	0	0	0	0.00100246
	2	2	2	2	2	2	2	2	2	2	2	2	2	2	2	2	2	2	2	2	2	2	2	2	2	2	2	2	2	2	2	2	2	2	2	2	2	2	2	2	2	2	2	2	2	2	2	2
Sum cations	15.4466	15.494	15.4708	15.4067	15.4549	15.4371	15.4119	15.4901	15.5566	15.5322	15.4955	15.5288	15.4852	15.484	15.3254	15.4461	15.459	15.441	15.4704	15.3784	15.3833	15.4017	15.4376	15.4573	15.4232	15.3295	15.4535	15.4523	15.3824	15.4693	15.4496	15.3683	15.4549	15.4977	15.4766	15.4732	15.3927	15.3824	15.434	15.4459	15.4081	15.4377	15.3883	15.3788	15.367	15.4603	15.3832	15.5357
Cation CHG	46	46	46	46	46	46	46	46	46	46	46	46	46	46	46	46	46	46	46	46	46	46	46	46	46	46	46	46	46	46	46	46	46	46	46	46	46	46	46	46	46	46	46	46	46	46	46	46
f1	1.03582	1.03266	1.03421	1.03851	1.03527	1.03646	1.03816	1.03292	1.0285	1.03012	1.03256	1.03035	1.03325	1.03333	1.04402	1.03586	1.03499	1.0362	1.03423	1.04042	1.04009	1.03885	1.03643	1.03511	1.0374	1.04374	1.03537	1.03544	1.04015	1.03431	1.03562	1.04111	1.03527	1.03241	1.03382	1.03404	1.03945	1.04015	1.03668	1.03588	1.03842	1.03642	1.03975	1.04039	1.04119	1.03491	1.0401	1.02988
f2	1.13874	1.15366	1.14383	1.12616	1.13977	1.15225	1.11309	1.14352	1.16384	1.15481	1.15746	1.15576	1.15784	1.14431	1.10699	1.13786	1.13512	1.13	1.13916	1.11167	1.11526	1.11529	1.12835	1.13292	1.13215	1.0973	1.12752	1.15581	1.12067	1.13661	1.13534	1.10381	1.14707	1.14489	1.14392	1.14568	1.11397	1.10549	1.12568	1.12739	1.11341	1.12984	1.1096	1.13636	1.11226	1.13079	1.10827	1.15367
f3	0.992424	0.991094	0.991167	0.993024	0.989928	0.998454	0.991764	0.993914	0.993006	0.991557	0.99406	0.991767	0.996496	0.990843	0.994241	0.991775	0.995763	0.994043	0.990801	0.996534	0.992787	0.993631	0.992318	0.9927	0.994629	0.992368	0.992863	0.995397	0.990791	0.994491	0.998084	0.992067	0.992421	0.992322	0.992425	0.994005	0.992666	0.993292	0.992183	0.995333	0.994052	0.993082	0.992753	0.996578	0.992644	0.994704	0.992645	0.992716
f4	1.03201	1.04025	1.01327	1.02769	1.0185	1.03977	1.00613	1.03327	1.04025	1.0302	1.01925	1.03687	1.06201	1.00313	0.995484	1.00761	1.02271	1.02591	1.01047	1.03497	1.03635	1.04304	1.04227	1.01985	1.03823	1.02789	1.02307	1.05953	1.02408	1.05118	1.03233	1.0306	1.03088	1.03523	1.04154	1.03836	1.03124	1.0345	1.02581	1.03387	1.01624	1.03001	1.02796	1.06579	1.023	1.03682	1.02375	1.03923
f5	1	1	1	1	1	1	1	1	1	1	1	1	1	1	1	1	1	1	1	1	1	1	1	1	1	1	1	1	1	1	1	1	1	1	1	1	1	1	1	1	1	1	1	1	1	1	1	1
f6	0.970558	0.972298	0.968233	0.973194	0.970276	0.963039	0.988066	0.974725	0.972566	0.975628	0.968204	0.976357	0.961578	0.979717	0.974883	0.973596	0.974795	0.978625	0.978576	0.974475	0.97566	0.977266	0.974893	0.971091	0.965342	0.976307	0.975049	0.950988	0.971125	0.973265	0.968133	0.98121	0.965295	0.973561	0.970987	0.963442	0.972061	0.978515	0.972775	0.970566	0.98048	0.971804	0.976534	0.95534	0.973994	0.972705	0.977328	0.969272
f7	0.97804	0.976013	0.975851	0.979881	0.976524	0.981793	0.977839	0.975803	0.973314	0.973959	0.976927	0.974512	0.977549	0.975716	0.984016	0.978285	0.979995	0.980242	0.976126	0.981211	0.979824	0.979219	0.97749	0.976317	0.979134	0.982601	0.977114	0.97855	0.97977	0.9769	0.979178	0.980228	0.9781	0.975194	0.976837	0.977368	0.979488	0.979674	0.978154	0.97731	0.978818	0.978278	0.979719	0.982657	0.98131	0.976949	0.979839	0.974393
f8	0.979012	0.976371	0.980253	0.980299	0.978091	0.984753	0.981978	0.980524	0.97853	0.978284	0.982678	0.977595	0.979534	0.981372	0.986404	0.981773	0.984114	0.981706	0.980245	0.983251	0.97882	0.978854	0.977477	0.981045	0.980642	0.979526	0.98077	0.978628	0.978278	0.97872	0.985377	0.978805	0.979167	0.978449	0.977697	0.97992	0.979394	0.979648	0.97961	0.982044	0.983103	0.980038	0.979954	0.97913	0.980533	0.980923	0.980426	0.978343
f9	0.66264	0.662589	0.662593	0.662956	0.66287	0.661134	0.664372	0.662803	0.662437	0.662908	0.661972	0.66287	0.661325	0.663277	0.663185	0.662888	0.662762	0.663202	0.663333	0.663089	0.663386	0.663501	0.663214	0.662927	0.662271	0.663847	0.6633	0.660738	0.663121	0.662807	0.662139	0.6641	0.662106	0.662886	0.662651	0.662026	0.66332	0.663867	0.663198	0.662798	0.66374	0.662927	0.663688	0.661135	0.663332	0.662925	0.663761	0.662535
f10	0.960376	0.95902	0.957163	0.961328	0.96012	0.957374	0.963092	0.961737	0.960073	0.960065	0.959535	0.960232	0.960627	0.961854	0.963868	0.962135	0.958228	0.959373	0.961194	0.96264	0.962832	0.960663	0.960561	0.957255	0.958248	0.962707	0.959954	0.956852	0.960643	0.960307	0.955975	0.9617	0.958	0.9581	0.958289	0.957388	0.961521	0.961944	0.960428	0.959639	0.959003	0.959827	0.962021	0.959935	0.96207	0.960437	0.961202	0.957904
smallest f1-5	0.992424	0.991094	0.991167	0.993024	0.989928	0.998454	0.991764	0.993914	0.993006	0.991557	0.99406	0.991767	0.996496	0.990843	0.994241	0.991775	0.995763	0.994043	0.990801	0.996534	0.992787	0.993631	0.992318	0.9927	0.994629	0.992368	0.992863	0.995397	0.990791	0.994491	0.998084	0.992067	0.992421	0.992322	0.992425	0.994005	0.992666	0.993292	0.992183	0.995333	0.994052	0.993082	0.992753	0.996578	0.992644	0.994704	0.992645	0.992716
largest f6-10	0.979012	0.976371	0.980253	0.980299	0.978091	0.984753	0.988066	0.980524	0.97853	0.978284	0.982678	0.977595	0.979534	0.981372	0.986404	0.981773	0.984114	0.981706	0.980245	0.983251	0.979824	0.979219	0.97749	0.981045	0.980642	0.982601	0.98077	0.978628	0.97977	0.97872	0.985377	0.98121	0.979167	0.978449	0.977697	0.97992	0.979488	0.979674	0.97961	0.982044	0.983103	0.980038	0.979954	0.982657	0.98131	0.980923	0.980426	0.978343
av f	0.985718	0.983733	0.98571	0.986661	0.984009	0.991603	0.989915	0.987219	0.985768	0.98492	0.988369	0.984681	0.988015	0.986107	0.990322	0.986774	0.989938	0.987875	0.985523	0.989893	0.986305	0.986425	0.984904	0.986873	0.987636	0.987485	0.986816	0.987012	0.985281	0.986606	0.99173	0.986639	0.985794	0.985386	0.985061	0.986963	0.986077	0.986483	0.985896	0.988688	0.988577	0.98656	0.986354	0.989617	0.986977	0.987814	0.986536	0.98553
[truncated: 5 more columns]

## Sheet: Rush Creek
Plagioclase-Hornblende Thermobarometry (temperature by Holland and Blundy, 1994; Blundy and Holland, 1990;
at pressure by Schmidt, 1992 and Anderson and Smith, 1995)
Spreadsheet prepared by Lawford Anderson, University of Southern California (anderson@usc.edu)
References:	Anderson, J. L. 1996. Status of thermobarometry in granitic batholiths: Transactions of the Royal Society of Edinburgh, v. 87, 125-138. [also published in GSA Special Paper 315]
	Anderson, J. L. & Smith, D. R. 1995. The effect of temperature and oxygen fugacity on Al-in-hornblende barometry. AM MINERAL 80, 549-59.
	Blundy, J. D. & Holland, T. J. B. 1990. Calcic amphibole equilibria and a new amphibole-plagioclase geothermometer. CONTRIB MINERAL PETROL 104, 208-24.
	Holland, T. & Blundy, J. 1994. Non-ideal interactions in calcic amphiboles and their bearing on amphibole-plagioclase thermometry. CONTRIB MINERAL PETROL 116, 433-47.
	Johnson, M. C. & Rutherford, M. J. 1989. Experimental calibration of an aluminum-in-hornblende geobarometer with application to Long Valley caldera (California) volcanic rocks. GEOL 17, 837-841.
	Otten, M. T. 1984. The origin of brown hornblende in the Artfjallet gabbro and dolerites. CONTRIB MINERAL PETROL 86, 189-99.
	Schmidt, M. W. 1992. Amphibole composition in tonalite as a function of pressure: an experimental calibration of the Al-in-hornblende barometer. CONTRIB MINERAL PETROL 110, 304-10.
	Schmidt, M. W. 1993. Phase relations and compositions in tonalite as a function of pressure: an experimental study at 650 °C. AMER J SCIENCE 293, 1011-60.
To use this spreadsheet, simply paste in amphibole (wt. % elements, excluding Sum) and plagioclase (mole fraction) analyses in the examples shown below and use the "Save As" option to protect the original. Cells below the data section are not protected and modification could currupt calculations.
	Extend cell formatting as needed, and re-save
	Final P-T Solution - see section below "Results based on iteration using Anderson and Smith pressure at various thermometers"; Note preferred calibration as explained in Anderson (1996).
Add data for elements					D75 - Rush Creek granodiorite, Waugh Lake area, Sierras
Sample	D75
Texture	93	89	88	95	109	90	111	110	106	114	94	108	115	112	105	107	91	92
Specimen	core	mid	core	rim	core	mid	mid	mid	mid	mid	mid	rim	rim	rim	rim	core	rim	rim
SiO2	50.077	49.4	48.488	47.681	46.928	46.9	46.781	46.573	46.468	46.15	48.134	46.472	47.522	46.393	46.373	45.949	46.582	45.626
TiO2	0.796	0.643	0.673	0.402	1.043	1.132	1.108	1.125	1.198	1.297	1.237	1.211	1.156	0.586	0.473	1.37	0.563	0.586
Al2O3	4.185	4.956	5.562	6.285	6.35	6.377	6.498	6.537	6.63	6.786	6.893	6.897	6.917	7.003	7.171	7.265	7.745	7.817
FeO*	16.972	16.942	17.409	18.804	17.617	18.977	18.564	18.02	17.929	18.774	19.346	18.214	18.439	19.037	18.718	18.685	19.016	19.237
MgO	13.171	13.015	12.429	11.503	11.878	11.239	11.317	11.922	11.738	11.204	11.455	11.455	11.26	10.785	11.154	11.136	10.961	10.79
MnO	0.66	0.587	0.544	0.64	0.517	0.696	0.704	0.595	0.632	0.659	0.636	0.529	0.593	0.543	0.486	0.669	0.626	0.529
CaO	11.759	11.961	11.951	11.838	11.755	11.216	11.324	10.989	11.367	11.14	10.934	11.435	11.608	11.823	11.878	11.189	11.76	11.746
Na2O	0.674	0.708	0.697	0.894	0.87	1	1.038	1.041	1.067	1.189	1.247	1.016	0.937	0.947	0.869	1.185	1.022	0.976
K2O	0.387	0.353	0.439	0.563	0.579	0.613	0.668	0.676	0.671	0.671	0.636	0.694	0.656	0.679	0.648	0.773	0.646	0.719
F	0	0	0	0	0	0	0	0	0	0	0	0	0	0	0	0	0	0
Cl	0.13	0.075	0.089	0.076	0.222	0.22	0.261	0.28	0.234	0.293	0.267	0.277	0.223	0.095	0.097	0.297	0.133	0.11
Sum	98.811	96.1	98.281	98.686	97.759	98.37	98.263	97.758	97.934	98.163	100.785	98.2	99.311	97.891	97.867	98.518	99.054	98.136
Add data for Plagioclase
Plag
XAb	0.750574	0.742029	0.742029	0.692551	0.692489	0.692489	0.683327	0.683327	0.679004	0.679004	0.661079	0.661079	0.661079	0.626316	0.626915	0.620646	0.620646	0.581002
X An	0.246283	0.250416	0.250416	0.299328	0.301135	0.301135	0.310053	0.310053	0.31504	0.31504	0.332602	0.332602	0.332602	0.365818	0.368566	0.374272	0.374272	0.414629
Do not add data below this row (except where indicated)
Fe2O3,calc	2.9129	4.65132	5.62304	6.72713	5.46419	5.04075	5.17258	5.09021	4.95065	4.7523	4.94719	5.70972	4.83385	6.21299	7.01967	5.41585	6.87067	7.50209
FeO,calc	14.3509	12.7567	12.3493	12.7508	12.7003	14.4413	13.9097	13.4398	13.4743	14.4978	14.8945	13.0763	14.0894	13.4465	12.4016	13.8118	12.8337	12.4865
H2O,calc	2.00878	2.01868	1.99958	1.99341	1.94241	1.94335	1.93169	1.92272	1.93665	1.91642	1.98446	1.92921	1.97016	1.96411	1.96733	1.92194	1.97994	1.96082
O=F, Cl	0.0293313	0.0169219	0.0200807	0.0171475	0.0500888	0.0496376	0.0588882	0.0631751	0.0527963	0.0661082	0.060242	0.0624982	0.0503145	0.0214344	0.0218857	0.0670107	0.0300082	0.0248188
SUM	101.082	101.108	100.824	101.336	100.199	100.769	100.654	100.128	100.314	100.489	103.205	100.639	101.715	100.456	100.516	100.916	101.692	100.824
Fe3/Fe* =	0.154434	0.247038	0.290636	0.321908	0.279091	0.239012	0.250719	0.254175	0.248461	0.227771	0.230101	0.282073	0.235889	0.293666	0.33745	0.260811	0.325111	0.350911
Formula per Holland and Blundy, 1994
T-sites
Si	7.30215	7.18786	7.09228	6.98805	6.94594	6.94747	6.93186	6.91659	6.89567	6.86962	6.94966	6.87175	6.94842	6.89021	6.86114	6.80662	6.82128	6.75342
Aliv	0.697852	0.812143	0.907723	1.01195	1.05406	1.05253	1.06814	1.08341	1.10433	1.13038	1.05034	1.12825	1.05158	1.10979	1.13886	1.19338	1.17872	1.24658
Al(total)	0.719441	0.850142	0.959113	1.08593	1.10805	1.11367	1.13514	1.14452	1.15991	1.19086	1.1733	1.20233	1.19233	1.22617	1.25083	1.26876	1.33708	1.36408
M1,2,3 sites
Alvi	0.0215892	0.0379985	0.0513907	0.0739787	0.0539952	0.0611416	0.0669962	0.0611152	0.0555724	0.0604854	0.122961	0.0740814	0.140748	0.11638	0.11197	0.0753793	0.158353	0.117499
Ti	0.0872933	0.0703621	0.0740324	0.044309	0.116102	0.126112	0.123474	0.125651	0.133701	0.145197	0.134319	0.134671	0.127117	0.0654535	0.0526317	0.152627	0.0620028	0.0652326
Fe3+	0.319643	0.509302	0.618942	0.741938	0.608628	0.561922	0.576786	0.56888	0.552855	0.532344	0.537523	0.635358	0.531877	0.694397	0.781583	0.603739	0.757136	0.835643
Mg	2.86228	2.82227	2.70938	2.51248	2.62014	2.48121	2.49916	2.63869	2.59596	2.48551	2.46484	2.52437	2.45364	2.38716	2.45948	2.45848	2.3921	2.38021
Mn	0.0815206	0.0723472	0.0674002	0.0794514	0.0648188	0.0873321	0.0883617	0.074849	0.079442	0.0830917	0.0777822	0.0662587	0.0734441	0.068311	0.0609086	0.0839446	0.0776485	0.0663251
Fe2+	1.62767	1.48772	1.47886	1.54784	1.53632	1.68229	1.64523	1.53081	1.58247	1.69337	1.66258	1.56526	1.67317	1.6683	1.53343	1.62583	1.55276	1.53509
Ca	0	0	0	0	0	0	0	0	0	0	0	0	0	0	0	0	0	0
	5	5	5	5	5	5	5	5	5	5	5	5	5	5	5	5	5	5
M4 site
Fe	0.122451	0.0646151	0.0318125	0.015037	0.0358067	0.106815	0.0785147	0.138453	0.0897964	0.111472	0.135932	0.0518391	0.0497312	0.00188368	0.00113618	0.085286	0.018958	0.0106176
Ca	1.83729	1.86481	1.87305	1.85901	1.8643	1.78027	1.79794	1.74868	1.80743	1.77681	1.69155	1.81178	1.81862	1.88149	1.88308	1.77599	1.84522	1.86293
Na	0.0402624	0.0705768	0.0951353	0.125948	0.0998925	0.112915	0.123549	0.112867	0.10277	0.111721	0.172517	0.136377	0.131645	0.116627	0.115785	0.138722	0.135818	0.126456
	2	2	2	2	2	2	2	2	2	2	2	2	2	2	2	2	2	2
A site
Ca	0	0	0	0	0	0	0	0	0	0	0	0	0	0	0	0	0	0
Na	0.150301	0.129167	0.102539	0.128099	0.149788	0.174309	0.174677	0.186895	0.20424	0.231449	0.176579	0.15492	0.133997	0.15608	0.133513	0.20164	0.15436	0.153653
K	0.0719954	0.0655282	0.0819214	0.105269	0.109335	0.11585	0.126281	0.128081	0.127036	0.127428	0.117152	0.130923	0.12237	0.128656	0.122317	0.146089	0.120687	0.135776
Sum A	0.222296	0.194695	0.184461	0.233368	0.259123	0.290159	0.300958	0.314976	0.331276	0.358877	0.293731	0.285844	0.256368	0.284736	0.25583	0.347728	0.275047	0.289429
OH site
O	0	0	0	0	0	0	0	0	0	0	0	0	0	0	0	0	0	0
OH	1.96765	1.9813	1.97764	1.98081	1.94357	1.94409	1.93363	1.92865	1.94044	1.92522	1.9339	1.92961	1.9441	1.97572	1.97526	1.92445	1.96644	1.9719
F	0	0	0	0	0	0	0	0	0	0	0	0	0	0	0	0	0	0
Cl	0.0323507	0.0187012	0.0223627	0.0191861	0.0564335	0.0559132	0.0663745	0.0713544	0.0595648	0.0747798	0.0661041	0.0703876	0.0559045	0.0242778	0.0247426	0.0755527	0.0335589	0.0281039
	2	2	2	2	2	2	2	2	2	2	2	2	2	2	2	2	2	2
Sum cations	15.2223	15.1947	15.1845	15.2334	15.2591	15.2902	15.301	15.315	15.3313	15.3589	15.2937	15.2858	15.2564	15.2847	15.2558	15.3477	15.275	15.2894
Cation CHG	46	46	46	46	46	46	46	46	46	46	46	46	46	46	46	46	46	46
Fe#	0.419656	0.422129	0.440095	0.478446	0.454239	0.486529	0.479308	0.458934	0.46154	0.484622	0.486585	0.471539	0.478882	0.497624	0.484993	0.484956	0.493301	0.500121
Mg/Fe2+	1.63548	1.81808	1.79349	1.6076	1.66662	1.38685	1.44984	1.58075	1.55236	1.37714	1.37049	1.56105	1.42413	1.42928	1.60272	1.43677	1.52197	1.53988
Mg/Fe	1.3829	1.36894	1.27224	1.0901	1.20148	1.05537	1.08634	1.17896	1.16666	1.06346	1.05514	1.12072	1.0882	1.00955	1.06188	1.06204	1.02716	0.999517
XMg	0.572457	0.564454	0.541875	0.502497	0.524028	0.496242	0.499831	0.527739	0.519192	0.497102	0.492968	0.504874	0.490729	0.477432	0.491896	0.491696	0.47842	0.476041
XOH	0.983825	0.990649	0.988819	0.990407	0.971783	0.972043	0.966813	0.964323	0.970218	0.96261	0.966948	0.964806	0.972048	0.987861	0.987629	0.962224	0.983221	0.985948
cm	0.122451	0.0646151	0.0318125	0.015037	0.0358067	0.106815	0.0785147	0.138453	0.0897964	0.111472	0.135932	0.0518391	0.0497312	0.00188368	0.00113618	0.085286	0.018958	0.0106176
XSi,T1	0.825537	0.796964	0.773069	0.747011	0.736486	0.736867	0.732965	0.729148	0.723916	0.717405	0.737416	0.717938	0.737104	0.722552	0.715285	0.701655	0.705319	0.688355
XAl,T1	0.174463	0.203036	0.226931	0.252989	0.263514	0.263133	0.267035	0.270852	0.276084	0.282595	0.262584	0.282062	0.262896	0.277448	0.284715	0.298345	0.294681	0.311645
XAl,M2	0.0107946	0.0189993	0.0256954	0.0369894	0.0269976	0.0305708	0.0334981	0.0305576	0.0277862	0.0302427	0.0614803	0.0370407	0.0703741	0.0581899	0.0559848	0.0376896	0.0791767	0.0587493
Xvac,A	0.777704	0.805305	0.815539	0.766632	0.740877	0.709841	0.699042	0.685024	0.668724	0.641123	0.706269	0.714156	0.743632	0.715264	0.74417	0.652272	0.724953	0.710571
XNa,A	0.150301	0.129167	0.102539	0.128099	0.149788	0.174309	0.174677	0.186895	0.20424	0.231449	0.176579	0.15492	0.133997	0.15608	0.133513	0.20164	0.15436	0.153653
XNa,M4	0.0201312	0.0352884	0.0475677	0.062974	0.0499463	0.0564573	0.0617743	0.0564333	0.0513852	0.0558604	0.0862586	0.0681885	0.0658226	0.0583136	0.0578923	0.069361	0.0679092	0.0632282
XCa,M4	0.918643	0.932404	0.936526	0.929507	0.93215	0.890135	0.898968	0.87434	0.903717	0.888404	0.845776	0.905892	0.909312	0.940745	0.94154	0.887996	0.922612	0.931463
XK,A	0.0719954	0.0655282	0.0819214	0.105269	0.109335	0.11585	0.126281	0.128081	0.127036	0.127428	0.117152	0.130923	0.12237	0.128656	0.122317	0.146089	0.120687	0.135776
Ked-tr	1.93822	1.91523	2.12043	1.29075	1.00964	0.832897	0.791657	0.711125	0.614823	0.503595	0.783164	0.818095	1.08489	0.788359	0.925873	0.497996	0.735827	0.625923
Thermometry based on arbitrary pressure (user may input arbitary pressures in Kb))
P kb (var input)	2	2	2	2	2	2	2	2	2	2	2	2	2	2	2	2	2	2
T (C) HB1 '94	683.555	694.626	689.345	719.722	741.834	747.887	749.131	757.096	768.341	777.777	736.77	753.373	714.033	746.481	742.548	787.712	747.781	777.12
T (C) HB2 '94	613.517	650.886	670.092	711.827	709.431	720.944	728.974	729.864	728.107	738.362	744.503	744.71	712.485	729.589	731.544	773.567	737.042	765.526
T (C) BH '90	618.102	646.481	667.888	701.843	711.064	710.731	716.399	719.729	725.385	731.047	718.152	735.312	718.428	740.867	747.19	761.201	757.931	785.821
P kb (var input)	8	8	8	8	8	8	8	8	8	8	8	8	8	8	8	8	8	8
T (C) HB1 '94	618.978	631.979	629.072	658.66	676.194	681.568	683.173	689.371	698.484	706.683	678.424	688.669	660.442	687.28	683.982	718.688	693.865	716.219
T (C) HB2 '94	615.278	654.081	674.467	718.331	714.068	726.27	734.859	735.197	732.904	743.613	755.795	751.284	725.035	739.896	741.43	780.334	751.209	776.044
T (C) BH '90	542.087	568.046	587.628	618.686	627.121	626.817	632.001	635.047	640.22	645.399	633.605	649.301	633.857	654.382	660.165	672.982	669.99	695.502
Results based on Schmidt pressure (used for purposes of calculation)
Pschmidt (kb)	0.414541	1.03667	1.55538	2.15904	2.26433	2.29108	2.39324	2.43792	2.51116	2.65852	2.57489	2.71309	2.66549	2.82658	2.94395	3.02929	3.35449	3.48301
T (C) HB1 '94	700.619	704.684	693.812	718.104	738.942	744.67	744.808	752.153	762.39	769.974	731.18	745.683	708.089	738.325	733.334	775.871	735.61	762.067
T (C) HB2 '94	613.051	650.373	669.768	711.999	709.635	721.202	729.359	730.254	728.516	738.939	745.585	745.492	713.877	731.009	733.099	774.728	740.24	768.126
T (C) BH '90	638.188	659.074	673.836	699.639	707.366	706.66	710.868	713.548	718.13	721.647	710.051	725.089	709.048	728.952	733.498	746.067	738.078	763.497
Results based on iteration using Anderson and Smith pressure at various thermometers (note: jla prefers HB2 results)
T (C) HB1*	702.45	707.134	695.288	722.853	748.11	755.265	755.51	765.121	778.985	789.795	738.077	756.787	711.224	746.931	741.007	797.863	743.344	777.572
P(Kb) HB1*	0.244473	0.80202	1.40842	1.69241	1.42631	1.33246	1.4197	1.28893	1.08566	0.985368	1.86563	1.68333	2.31445	1.95438	2.15778	1.11714	2.49378	1.95532		Average T and P			error
T (C) HB2	613.063	650.422	669.789	711.64	709.394	720.804	728.809	729.74	728.069	738.309	744.074	744.59	713.096	729.964	732.033	773.174	738.401	765.87		T	733.864	±	18.1631	degrees C
P(Kb) HB2	0.453457	1.12934	1.58485	1.82734	1.95302	1.84235	1.83206	1.86064	1.95194	1.9388	1.77239	1.88977	2.29188	2.2182	2.29655	1.65233	2.57555	2.19584		P	2.00658	±	0.251437	kbar
T (C) BH	637.167	658.137	673.736	702.934	712.161	711.34	716.51	719.83	725.584	730.208	715.701	734.683	714.569	739.88	746.108	763.539	753.217	790.904
P(Kb) BH	0.49511	1.10835	1.56284	1.9213	1.92158	1.95649	1.99213	1.99283	1.98595	2.05875	2.17395	2.0438	2.2738	2.06836	2.07443	1.84061	2.32134	1.66051
*	HB 1 refers to Holland and Blundy Hbld-Plag thermometry calibration reaction edenite + 4 quartz = tremolite + albite
	HB 2 refers to Holland and Blundy Hbld-Plag thermometry calibration reaction edenite + albite = richterite + anorthite
	BH refers to Blundy and Holland Hbld-Plag thermometry calibration reaction edenite + 4 quartz = tremolite + albite
Temperature based on Ti (Otten, 1984) - warning: semi empirical; best used to determine magmatic versus secondary compositions
T (C) Ti-hbld	650.101	629.716	634.135	598.348	684.787	696.839	693.663	696.284	705.976	719.817	706.72	707.144	698.049	623.806	608.369	728.763	619.651	623.54
**********************************************************************************************************************************
Data below used for iterative calculations
Iterations for Anderson and Smith/Holland and Blundy
Iteration 1 (using T at Schmidt P)
Pas HB1	0.258734	0.824441	1.42084	1.75147	1.5679	1.50498	1.59564	1.51659	1.40348	1.39151	1.96732	1.87203	2.3513	2.09267	2.27705	1.59757	2.62038	2.27033
Pas HB2	0.45342	1.12945	1.58497	1.82326	1.95032	1.8373	1.82445	1.85347	1.94574	1.92913	1.7482	1.87514	2.28232	2.20298	2.28058	1.6209	2.54548	2.15079
Pas BH	0.495276	1.1053	1.56226	1.9544	1.97547	2.0088	2.05925	2.07028	2.08338	2.17662	2.24194	2.18131	2.34016	2.23279	2.27457	2.15251	2.58078	2.24253
Iteration 2 (using prior P for new T and P)
T (C) HB1	702.296	706.9	695.163	722.252	746.561	753.359	753.576	762.552	775.286	784.987	737.088	754.753	710.895	745.566	739.843	792.341	742.207	774.376
P(Kb) HB1	0.245685	0.804195	1.40948	1.70004	1.45096	1.36453	1.45255	1.33569	1.15946	1.08839	1.88057	1.71905	2.31838	1.97692	2.17635	1.24342	2.51287	2.0227
T (C) HB2	613.063	650.422	669.789	711.635	709.392	720.8	728.801	729.734	728.064	738.3	744.029	744.574	713.076	729.937	732.006	773.139	738.33	765.791
P(Kb) HB2	0.453457	1.12934	1.58485	1.82739	1.95305	1.8424	1.83216	1.86073	1.95201	1.93893	1.77311	1.89003	2.29212	2.21858	2.29694	1.65305	2.5767	2.19741
T (C) BH	637.165	658.177	673.744	702.475	711.407	710.608	715.566	718.737	724.202	728.526	714.743	732.713	713.634	737.511	743.207	758.958	749.418	782.17
P(Kb) BH	0.495109	1.10823	1.56279	1.92599	1.93024	1.96485	2.00363	2.00666	2.00454	2.08263	2.18576	2.07298	2.28531	2.10527	2.12223	1.92606	2.38913	1.85614
Iteration 3
T (C) HB1	702.437	707.112	695.277	722.775	747.84	754.911	755.149	764.594	778.127	788.578	737.932	756.402	711.189	746.709	740.826	796.416	743.173	776.889
P(Kb) HB1	0.244576	0.802231	1.40851	1.6934	1.43062	1.33845	1.42587	1.29859	1.10291	1.01171	1.86783	1.69012	2.31487	1.95807	2.16068	1.15061	2.49667	1.96982
T (C) HB2	613.063	650.422	669.789	711.64	709.394	720.804	728.809	729.741	728.069	738.309	744.076	744.59	713.096	729.964	732.033	773.175	738.404	765.872
P(Kb) HB2	0.453457	1.12934	1.58485	1.82734	1.95302	1.84235	1.83206	1.86064	1.95194	1.93879	1.77237	1.88977	2.29187	2.21819	2.29654	1.65232	2.5755	2.19579
T (C) BH	637.167	658.139	673.737	702.869	712.04	711.223	716.348	719.635	725.32	729.867	715.535	734.266	714.407	739.349	745.417	762.288	752.227	787.986
P(Kb) BH	0.49511	1.10835	1.56283	1.92197	1.92297	1.95783	1.99411	1.99531	1.98951	2.06361	2.17601	2.05003	2.2758	2.0767	2.08592	1.8642	2.33918	1.72692
Iteration 4
T (C) HB1	702.449	707.132	695.287	722.843	748.063	755.199	755.442	765.013	778.786	789.487	738.055	756.714	711.221	746.895	740.979	797.483	743.318	777.426
P(Kb) HB1	0.244482	0.802041	1.40842	1.69254	1.42706	1.33357	1.42086	1.29092	1.08967	0.992056	1.86595	1.68462	2.3145	1.95498	2.15823	1.12594	2.49422	1.95842
T (C) HB2	613.063	650.422	669.789	711.64	709.394	720.804	728.809	729.74	728.069	738.309	744.074	744.59	713.096	729.964	732.033	773.174	738.401	765.869
P(Kb) HB2	0.453457	1.12934	1.58485	1.82734	1.95302	1.84235	1.83206	1.86064	1.95194	1.9388	1.77239	1.88977	2.29188	2.2182	2.29655	1.65233	2.57555	2.19585
T (C) BH	637.167	658.137	673.736	702.925	712.142	711.321	716.482	719.795	725.534	730.139	715.672	734.595	714.541	739.761	745.943	763.198	752.96	789.932
P(Kb) BH	0.49511	1.10835	1.56284	1.92139	1.9218	1.9567	1.99247	1.99327	1.98663	2.05973	2.17431	2.04512	2.27415	2.07023	2.07718	1.84707	2.326	1.68276
Iteration 5
T (C) HB1	702.45	707.134	695.288	722.851	748.102	755.253	755.497	765.099	778.94	789.72	738.074	756.774	711.224	746.925	741.003	797.767	743.34	777.542
P(Kb) HB1	0.244474	0.802022	1.40842	1.69242	1.42644	1.33266	1.41991	1.28933	1.08656	0.987003	1.86568	1.68357	2.31446	1.95448	2.15785	1.11936	2.49385	1.95596
T (C) HB2	613.063	650.422	669.789	711.64	709.394	720.804	728.809	729.74	728.069	738.309	744.074	744.59	713.096	729.964	732.033	773.174	738.401	765.87
P(Kb) HB2	0.453457	1.12934	1.58485	1.82734	1.95302	1.84235	1.83206	1.86064	1.95194	1.9388	1.77239	1.88977	2.29188	2.2182	2.29655	1.65233	2.57555	2.19584
T (C) BH	637.167	658.137	673.736	702.933	712.158	711.337	716.505	719.824	725.575	730.194	715.696	734.665	714.564	739.854	746.07	763.449	753.153	790.596
P(Kb) BH	0.49511	1.10835	1.56284	1.92131	1.92161	1.95652	1.99218	1.99291	1.98608	2.05894	2.17401	2.04407	2.27386	2.06877	2.07507	1.8423	2.32251	1.66756
Iteration 6
T (C) HB1	702.45	707.134	695.288	722.853	748.109	755.263	755.508	765.117	778.976	789.78	738.076	756.785	711.224	746.93	741.007	797.843	743.344	777.567
P(Kb) HB1	0.244473	0.80202	1.40842	1.69241	1.42633	1.33249	1.41974	1.289	1.08583	0.985703	1.86564	1.68337	2.31446	1.95439	2.15779	1.11761	2.49379	1.95543
T (C) HB2	613.063	650.422	669.789	711.64	709.394	720.804	728.809	729.74	728.069	738.309	744.074	744.59	713.096	729.964	732.033	773.174	738.401	765.87
P(Kb) HB2	0.453457	1.12934	1.58485	1.82734	1.95302	1.84235	1.83206	1.86064	1.95194	1.9388	1.77239	1.88977	2.29188	2.2182	2.29655	1.65233	2.57555	2.19584
T (C) BH	637.167	658.137	673.736	702.934	712.161	711.34	716.509	719.829	725.583	730.205	715.7	734.68	714.568	739.875	746.101	763.52	753.204	790.825
P(Kb) BH	0.49511	1.10835	1.56284	1.9213	1.92158	1.95649	1.99213	1.99284	1.98597	2.05878	2.17396	2.04385	2.27381	2.06844	2.07456	1.84098	2.32159	1.66232
Iteration 7
T (C) HB1*	702.45	707.134	695.288	722.853	748.11	755.265	755.51	765.121	778.985	789.795	738.077	756.787	711.224	746.931	741.007	797.863	743.344	777.572
P(Kb) HB1*	0.244473	0.80202	1.40842	1.69241	1.42631	1.33246	1.4197	1.28893	1.08566	0.985368	1.86563	1.68333	2.31445	1.95438	2.15778	1.11714	2.49378	1.95532
T (C) HB2	613.063	650.422	669.789	711.64	709.394	720.804	728.809	729.74	728.069	738.309	744.074	744.59	713.096	729.964	732.033	773.174	738.401	765.87
P(Kb) HB2	0.453457	1.12934	1.58485	1.82734	1.95302	1.84235	1.83206	1.86064	1.95194	1.9388	1.77239	1.88977	2.29188	2.2182	2.29655	1.65233	2.57555	2.19584
T (C) BH	637.167	658.137	673.736	702.934	712.161	711.34	716.51	719.83	725.584	730.208	715.701	734.683	714.569	739.88	746.108	763.539	753.217	790.904
P(Kb) BH	0.49511	1.10835	1.56284	1.9213	1.92158	1.95649	1.99213	1.99283	1.98595	2.05875	2.17395	2.0438	2.2738	2.06836	2.07443	1.84061	2.32134	1.66051
Formula per 23 Oxygens (all Fe as FeO)
Atom prop	2.60666	2.60146	2.58161	2.56953	2.55177	2.55231	2.55073	2.54544	2.54831	2.54161	2.62005	2.55276	2.58752	2.53828	2.54303	2.54995	2.57081	2.53894
T-sites
Si	7.35324	7.26833	7.18901	7.1026	7.03908	7.03339	7.01988	7.0032	6.97955	6.95005	7.03183	6.96799	7.0297	6.99581	6.97973	6.89714	6.93543	6.87837
Aliv	0.646756	0.73167	0.810993	0.897396	0.960923	0.966614	0.980118	0.996798	1.02045	1.04995	0.968167	1.03201	0.970301	1.00419	1.02027	1.10286	1.06457	1.12163
Al(total)	0.724475	0.85966	0.972195	1.10374	1.12291	1.12745	1.14955	1.15885	1.17402	1.20481	1.18717	1.21917	1.20628	1.24497	1.27245	1.28563	1.35945	1.38932
M1,2,3 sites
Alvi	0.0777193	0.12799	0.161202	0.206339	0.161987	0.160832	0.169431	0.162055	0.153567	0.154859	0.219002	0.187164	0.235977	0.240779	0.252182	0.182776	0.294883	0.267691
Ti	0.0879041	0.0711499	0.0750421	0.0450354	0.117659	0.127671	0.125042	0.127224	0.135327	0.146897	0.135907	0.136558	0.128604	0.0664567	0.0535414	0.154657	0.0630404	0.0664395
Fe3+	0	0	0	0	0	0	0	0	0	0	0	0	0	0	0	0	0	0
Mg	2.88231	2.85387	2.74633	2.55367	2.65527	2.51189	2.53089	2.67173	2.62754	2.51461	2.49398	2.55972	2.48234	2.42375	2.50199	2.49117	2.43213	2.42425
Mn	0.082091	0.0731572	0.0683195	0.0807538	0.0656879	0.0884121	0.0894837	0.0757862	0.0804084	0.0840645	0.0787018	0.0671867	0.0743032	0.069358	0.0619613	0.085061	0.0789479	0.0675523
Fe2+	1.86997	1.87384	1.94911	2.1142	1.9994	2.11119	2.08515	1.9632	2.00316	2.09957	2.07241	2.04937	2.07877	2.19966	2.13032	2.08633	2.131	2.17407
Ca	0	0	0	0	0	0	0	0	0	0	0	0	0	0	0	0	0	0
	5	5	5	5	5	5	5	5	5	5	5	5	5	5	5	5	5	5
M4 site
Fe	0.214274	0.210883	0.20955	0.228399	0.210597	0.268904	0.244586	0.30297	0.249031	0.264983	0.291244	0.234638	0.202384	0.201163	0.225856	0.259311	0.236829	0.251344
Ca	1.78573	1.78912	1.79045	1.7716	1.7894	1.7311	1.75541	1.69703	1.75097	1.73502	1.70876	1.76536	1.79762	1.79884	1.77414	1.74069	1.76317	1.74866
Na	0	0	0	0	0	0	0	0	0	0	0	0	0	0	0	0	0	0
	2	2	2	2	2	2	2	2	2	2	2	2	2	2	2	2	2	2
A site
Ca	0.0644165	0.0965693	0.108149	0.11789	0.0998949	0.0711905	0.0653532	0.0735473	0.0784513	0.0625941	0.00279485	0.0717967	0.0422819	0.11149	0.141483	0.0589228	0.112933	0.148738
Na	0.191897	0.20198	0.200371	0.258212	0.253029	0.290776	0.302012	0.303515	0.310745	0.347188	0.353224	0.295377	0.26875	0.276887	0.253606	0.344888	0.295034	0.285292
K	0.0724992	0.0662619	0.0830387	0.106995	0.110801	0.117283	0.127885	0.129685	0.128581	0.12892	0.118537	0.132757	0.123802	0.130628	0.124431	0.148031	0.122707	0.138288
Sum A	0.328812	0.364811	0.391558	0.483096	0.463724	0.479249	0.49525	0.506747	0.517778	0.538702	0.474556	0.499931	0.434834	0.519005	0.519521	0.551842	0.530674	0.572318
OH site
O	0	0	0	0	0	0	0	0	0	0	0	0	0	0	0	0	0	0
OH	1.96765	1.9813	1.97764	1.98081	1.94357	1.94409	1.93363	1.92865	1.94044	1.92522	1.9339	1.92961	1.9441	1.97572	1.97526	1.92445	1.96644	1.9719
F	0	0	0	0	0	0	0	0	0	0	0	0	0	0	0	0	0	0
Cl	0.0323507	0.0187012	0.0223627	0.0191861	0.0564335	0.0559132	0.0663745	0.0713544	0.0595648	0.0747798	0.0661041	0.0703876	0.0559045	0.0242778	0.0247426	0.0755527	0.0335589	0.0281039
	2	2	2	2	2	2	2	2	2	2	2	2	2	2	2	2	2	2
Sum cations	15.3288	15.3648	15.3916	15.4831	15.4637	15.4792	15.4952	15.5067	15.5178	15.5387	15.4746	15.4999	15.4348	15.519	15.5195	15.5518	15.5307	15.5723
Cation CHG	46	46	46	46	46	46	46	46	46	46	46	46	46	46	46	46	46	46
f1	1.04379	1.04134	1.03953	1.03339	1.03468	1.03364	1.03257	1.03181	1.03108	1.02969	1.03396	1.03226	1.03662	1.03099	1.03096	1.02882	1.03022	1.02746
f2	1.08796	1.10067	1.11281	1.12635	1.13651	1.13743	1.13962	1.14233	1.14621	1.15107	1.13768	1.14811	1.13803	1.14354	1.14618	1.1599	1.1535	1.16307
f3	0.995724	0.993603	0.992842	0.992202	0.993384	0.995276	0.995662	0.995121	0.994797	0.995844	0.999814	0.995236	0.997189	0.992622	0.990656	0.996087	0.992527	0.990181
f4	1.081	1.06062	1.05341	1.05849	1.05859	1.1097	1.09844	1.12958	1.09324	1.11259	1.16853	1.08864	1.08702	1.04694	1.04404	1.11135	1.06604	1.05408
f5	1	1	1	1	1	1	1	1	1	1	1	1	1	1	1	1	1	1
f6	0.990379	0.984253	0.980248	0.974856	0.980154	0.980292	0.97926	0.980145	0.981166	0.98101	0.973354	0.977139	0.971348	0.970782	0.969441	0.977663	0.96445	0.967622
f7	0.9832	0.980485	0.979847	0.97554	0.977013	0.976438	0.976094	0.975479	0.97471	0.973408	0.976816	0.976107	0.979686	0.974762	0.974337	0.973785	0.973522	0.971878
f8	0.976217	0.976468	0.976566	0.975175	0.976489	0.972198	0.973983	0.969708	0.973656	0.972485	0.970564	0.974715	0.977096	0.977187	0.975362	0.972901	0.974554	0.973486
f9	0.664628	0.664217	0.663763	0.663578	0.663232	0.663124	0.663051	0.663114	0.663119	0.662962	0.662314	0.662694	0.662196	0.662895	0.662914	0.662527	0.662277	0.662567
f10	0.959348	0.959264	0.957628	0.954039	0.956535	0.954105	0.954671	0.957322	0.956453	0.954357	0.954948	0.955449	0.954809	0.952181	0.953689	0.954645	0.953674	0.952738
smallest f1-5	0.995724	0.993603	0.992842	0.992202	0.993384	0.995276	0.995662	0.995121	0.994797	0.995844	0.999814	0.995236	0.997189	0.992622	0.990656	0.996087	0.992527	0.990181
largest f6-10	0.990379	0.984253	0.980248	0.97554	0.980154	0.980292	0.97926	0.980145	0.981166	0.98101	0.976816	0.977139	0.979686	0.977187	0.975362	0.977663	0.974554	0.973486
av f	0.993051	0.988928	0.986545	0.983871	0.986769	0.987784	0.987461	0.987633	0.987981	0.988427	0.988315	0.986188	0.988437	0.984904	0.983009	0.986875	0.983541	0.981834
