# Supplementary material
Source: publisher figshare collection journal article supplement (https://gsapubs.figshare.com/articles/dataset/_/15025437)
Supplement: Supplementary file 1 [file 1]

Memeti, V., Paterson, S.R., and Mundil, R., 2021, Coupled magmatic and host rock processes during the initiation of the Tuolumne Intrusive Complex, Sierra Nevada, California, USA: A transition from ephemeral sheets to long-lived, active magma mushes: *GSA Bulletin*, <https://doi.org/10.1130/B35871.1>.

## Supplemental Material

Table S1. Thermobarometry results. Worksheet 1 includes a summary table of average pressure and temperature estimates for all samples. Calculations using rim compositions of hornblende and plagioclase in equilibrium with one another using the calibrations of Holland and Blundy (1994), Anderson and Smith (1995), and Anderson et al. (2008) are included in the subsequently following worksheets of the excel file. Sample locations and coordinate information can be found in Fig. 2 and Tables S3 and S4.

Table S2. LA-ICPMS U-Pb zircon geochronology age results of samples plotted in Fig. 12. Sample locations and coordinate information can be found in Fig. 2 and Tables S3 and S4.

Table S3. XRF and ICPMS whole rock major oxide, and trace and rare earth element results of Kuna Crest lobe sensu lato and Rush Creek pluton samples. Methods and procedures are explained in Knaack (2003) and Johnson et al. (1999). Major elements are normalized on a volatile-free basis, with total Fe expressed as FeO. Sample locations and coordinate information is included in the table (see also Fig. 2).

Table S4. ID-TIMS whole rock Sr-Nd isotope data. Analytical procedures are described in Otamendi et al. (2009) and Drew et al. (2009). Sample locations and coordinate information is included in the table (see also Fig. 2).

## REFERENCES CITED

- Anderson, J.L., and Smith, D.R., 1995, The effect of temperature and oxygen fugacity on Al-in-hornblende thermobarometry: *The American Mineralogist*, v. 80, p. 549–559, <https://doi.org/10.2138/am-1995-5-614>.
- Drew, S.T., Ducea, M.N., and Schoenbohm, L.M., 2009, Mafic volcanism on the Puna Plateau, NW Argentina: Implications for lithospheric composition and evolution with an emphasis on lithospheric foundering: *Lithosphere*, v. 1, no. 5, p. 305–318, <https://doi.org/10.1130/L54.1>.
- Holland, T., and Blundy, J., 1994, Non-ideal interactions in calcic amphiboles and their bearing on amphibole-plagioclase thermometry: *Contributions to Mineralogy and Petrology*, v. 116, p. 433–447, <https://doi.org/10.1007/BF00310910>.
- Johnson, D.M., Hooper, P.R., and Conrey, R.M., 1999, XRF analysis of rock and minerals for major and trace elements on a single low dilution Li-tetraborate fused bead: *Advances in X-Ray Analysis*, v. 41, p. 843–867.
- Knaack, C.M., 2003, REE and trace element analysis of rocks and minerals by ICP-MS using a combined fusion-dissolution, in *Proceedings, 5th International Conference on the Analysis of Geological and Environmental Materials*, Rovaniemi, Finland: Kuopio, Finland, Geological Survey of Finland.
- Otamendi, J.E., Ducea, M.N., Tibaldi, A.M., Bergantz, G., de la Rosa, J.D., and Vujovich, G.I., 2009, Generation of tonalitic and dioritic magmas by coupled partial melting of gabbroic and metasedimentary rocks within the deep crust of the Famatinian magmatic arc, Argentina: *Journal of Petrology*, v. 50, p. 841–873, <https://doi.org/10.1093/petrology/egp022>.
